# Supplementary material for: Serotonin modulates a depression-like state in Drosophila responsive to lithium treatment
Source: PubMed Central journal article supplement (PMC5467214; doi:10.1038/ncomms15738), 2017-06-06
Supplement: ncomms15738-s1.pdf [file ncomms15738-s1.pdf]

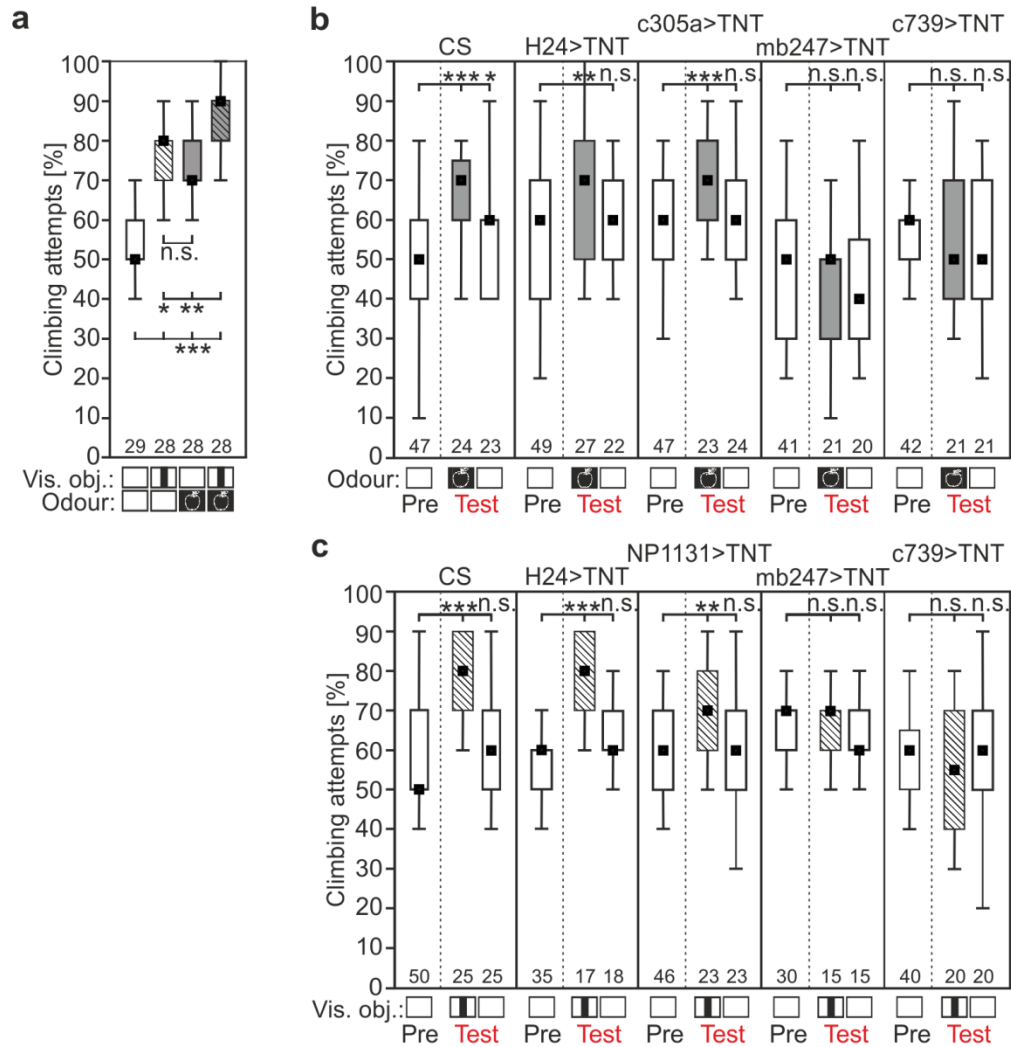

**Supplementary Figure 1 | Visual and odour stimuli enhance the motivation for trying to overcome a broad gap via mushroom body  $\alpha$ - $\beta$ -lobes.** Rate of climbing initiation of CS males at a just insurmountable gap of 4.5 mm width. Ten approaches to the gap per male fly. **(a)** An attractive visual landmark (dark vertical stripe with contact to the ground) as well as an attractive odour (yeast-apple juice) coming from the distal side of the gap enhance the fraction of climbing attempts as compared to a featureless climbing block. The combination of odour and visual cues is most effective. **(b)** Mapping of the odour-induced enhancement of climbing initiation by selective blocking the chemical synapses of groups of mushroom body Kenyon cells by UAS-TNT expression<sup>S1</sup>; wild-type CS for comparison. After a pre-test without odour half of the flies within a test group were tested 24h later and starved for 16h again without odour and the other half with yeast-apple juice odour coming from the distal side. A predominant block of  $\gamma$ -lobe neurons (*H24-GAL4*) or  $\alpha'$ - $\beta'$ -lobes (*c305a-GAL4*)<sup>S2</sup> does not impede the odour-induced increase of motivation. A predominant block of  $\alpha$ - $\beta$ - $\gamma$ -lobes (*mb247-GAL4*) or just  $\alpha$ - $\beta$ -lobes (*c739-GAL4*) precludes enhancement of motivation. **(c)** Corresponding experiment to (b) for mapping the

visually induced enhancement of climbing initiation by a dark vertical stripe behind the distal gap-side. Again, blocking of  $\gamma$ -lobes (*H24-GAL4*) or  $\alpha'$ - $\beta'$ -lobes (*NP1131-GAL4*)<sup>S2</sup> leaves the motivational enhancement intact. A predominant block of  $\alpha$ - $\beta$ - $\gamma$ -lobes (*mb247-GAL4*) or just  $\alpha$ - $\beta$ -lobes (*c739-GAL4*) precludes visual enhancement of motivation. Black squares, medians; boxes, 25% and 75% quartiles; whiskers, 10% and 90% quantiles; numbers of animals tested are indicated below the boxes; n.s., not significant; \*,  $p < 0.05$ ; \*\*,  $p < 0.01$ ; \*\*\*,  $p < 0.001$ ; Mann-Whitney-U test.

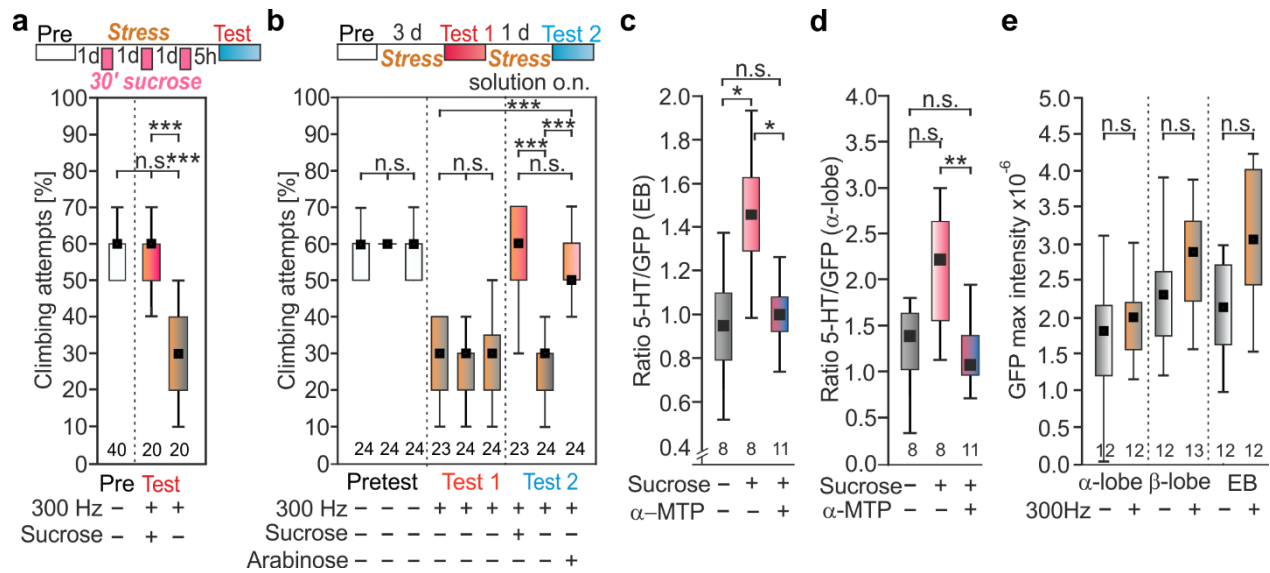

**Supplementary Figure 2 | Sweet sensation can prevent or relieve the depression like state.** (a) After each full-day vibration treatment (10 h), flies were put on 5% sucrose solution for 30 min and thereafter on regular fly food overnight. This daily treatment prevents the depression-like state. (b) Treating stressed flies overnight with either 5% sucrose or 5% arabinose relieves them from the depressive-like state. Note that arabinose has no caloric value to *Drosophila* suggesting that the sense of sweet can ameliorate the depressive-like state. (c-d) Sucrose offered overnight increases the 5-HT level in the entire brain in comparison to flies left overnight on water. 5-HT level does not increase when the blocker of 5-HT synthesis  $\alpha$ -methyl-DL-tryptophan ( $\alpha$ -MTP; 20mM) is added to the sucrose solution. 5-HT level was quantified from confocal stacks stained with 5-HT antibody of *189Y-GAL4>UAS-mCD8::GFP* flies. In the ellipsoid-body region layers with the broadest GFP expression were sampled in 22.5  $\mu$ m z-projections. At the  $\alpha$ -lobes of the mushroom body all layers expressing GFP were sampled (see Fig. 4c). (e) *189Y-GAL4* driven GFP expression does not change significantly upon stress application (control for 5-HT measurements in Fig.4d; z = 22.5  $\mu$ m). Black squares, medians; boxes, 25% and 75% quartiles; whiskers, 10% and 90% quantiles; numbers of animals tested are indicated below the boxes. n.s., not significant; \*, p<0.05; \*\*, p<0.01; \*\*\*, p<0.001; Kruskal-Wallis test.

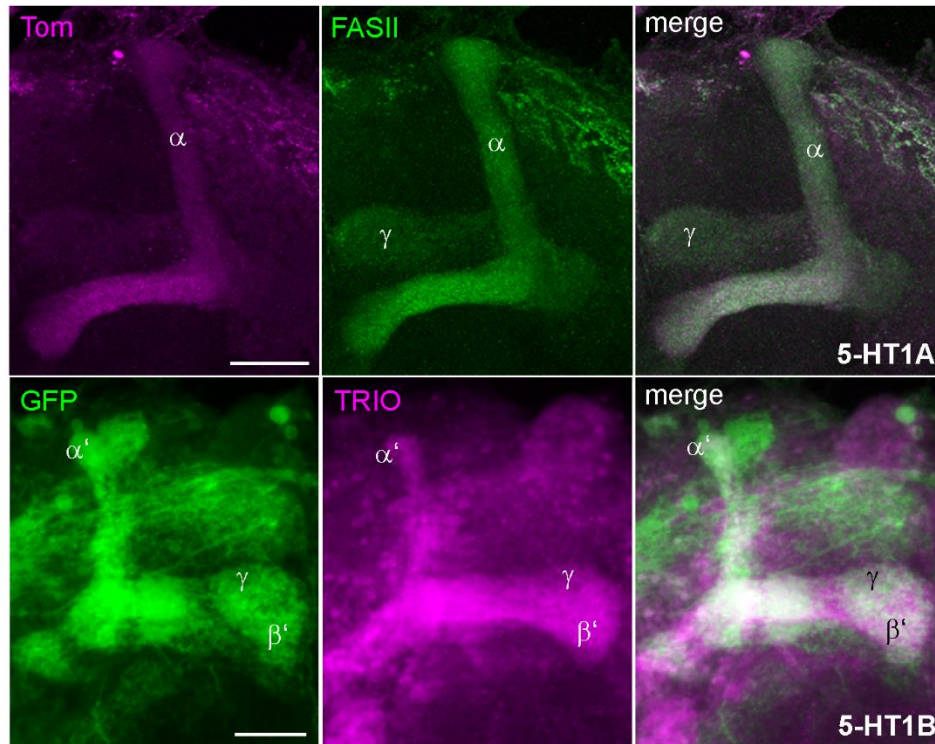

**Supplementary Figure 3 | Expression analysis of the 5-HT-1A and 5-HT-1B driver lines.** (a) The UAS-CD4::tandem-Tomato (Tom; magenta) was used to report the expression pattern of the 5-HT-1A-GAL4 driver line<sup>S3</sup>. A weak but specific signal is detected in the  $\alpha$ -/ $\beta$ -Kenyon cells of the mushroom body (52.5  $\mu\text{m}$  z-projection). Anti-Fasciclin II (FASII; green) was used to visualize the  $\alpha$ -/ $\beta$ -lobes (and weakly the  $\gamma$ -lobes) of the mushroom body. (b) Expression of mCD8-GFP (GFP; green) in the pattern of the 5-HT-1B driver line<sup>S4</sup> is detected in the  $\alpha'$ -/ $\beta'$ - and  $\gamma$ -Kenyon cells of the mushroom body (54.75  $\mu\text{m}$  z-projection). Anti-TRIO (magenta) was used to visualize the  $\alpha'$ -/ $\beta'$ - and  $\gamma$ -lobes) of the mushroom body. Scale bars denote 25 $\mu\text{m}$ .

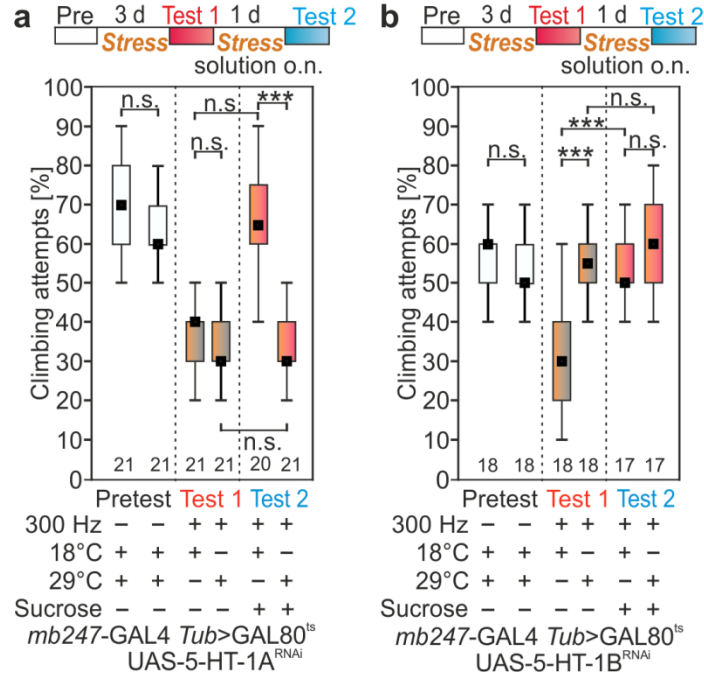

**Supplementary Figure 4 | Conditional knock down of 5-HT-1A and 5HT-1B receptor genes in the adult mushroom body.** To restrict the RNAi mediated knock downs to the adult stage the *mb247-GAL4* driver line (expresses in the  $\alpha$ -/ $\beta$ - and  $\gamma$ -Kenyon cells of the mushroom body<sup>S2</sup>) was combined with the ubiquitously expressed temperature-sensitive GAL4 repressor transgene *Tub>GAL80<sup>ts</sup>* (ref. S5). Flies were raised at the restrictive temperature of 18°C and tested for the motivation to climb at the 4.5mm gap (Pretest). After each day of stress application (~22°C lab temperature) the experimental group was shifted to 29°C overnight, whereas the controls were set on 18°C again. **(a)** Knock down of 5-HT-1A receptor gene expression (#25834) in the adult mushroom body prevents the sucrose relief of the depressive-like state. **(b)** Knock down of 5-HT-1B receptor gene expression (#27634) in the adult mushroom body conveys resilience to the vibration stress. Therefore feeding sucrose to the stressed flies changes the motivation to climb only in the control (18°C) group. Black squares, medians; boxes, 25% and 75% quartiles; whiskers, 10% and 90% quantiles; numbers of animals tested are indicated below the boxes. n.s., not significant; \*,  $p < 0.05$ ; \*\*,  $p < 0.01$ ; \*\*\*,  $p < 0.001$ ; Kruskal-Wallis test.

## Supplementary Table 1 | Statistical analysis for Figure 1.

Tab. 1a refers to data presented in Figure 1a.

p-values of the KOLMOGOROV-SMIRNOV-Test (KS); LILLIFORS-Tests (Lillif) and SHAPIRO-WILK-Test (SW)

|                               | N  | Std.Dev. | p KS   | p Lillif | p SW               |
|-------------------------------|----|----------|--------|----------|--------------------|
| <b>Pretest stressed group</b> | 50 | 0.7825   | < 0.01 | < 0.01   | < 10 <sup>-5</sup> |
| <b>Pretest control group</b>  | 50 | 0.7071   | < 0.01 | < 0.01   | < 10 <sup>-5</sup> |
| <b>Test 1 stressed group</b>  | 20 | 1.3018   | < 0.20 | < 0.01   | = 0.0606           |
| <b>Test 1 control group</b>   | 20 | 1.1743   | < 0.15 | < 0.01   | = 0.1166           |
| <b>Test 2 stressed group</b>  | 15 | 1.7182   | > 0.20 | > 0.20   | = 0.7916           |
| <b>Test 2 control group</b>   | 14 | 0.9972   | > 0.20 | < 0.05   | = 0.1737           |
| <b>Test 3 stressed group</b>  | 15 | 1.5523   | < 0.20 | < 0.01   | = 0.0382           |
| <b>Test 3 control group</b>   | 15 | 1.3558   | > 0.20 | < 0.15   | = 0.1543           |

Comparison of the unpaired median data by the MANN-WHITNEY-U-Test (MannU) at the individual days.

| Group                             | U       | Z       | 2*1 sided exact p |
|-----------------------------------|---------|---------|-------------------|
| <b>Pretest stress vs. control</b> | 1159.00 | -0.6273 | 0.5343            |
| <b>Test 1 stress vs. control</b>  | 195.50  | -0.1217 | 0.9042            |
| <b>Test 2 stress vs. control</b>  | 79.00   | -1.1347 | 0.2703            |
| <b>Test 3 stress vs. control</b>  | 37.00   | -3.1316 | 0.0012            |

Comparison of the unpaired median data by the KRUSKAL-WALLIS-TEST (K-W).

Upper row: multiple p-values; lower row: z-values

|                                                       | (2)               | (3)               | (4)               | (5)               | (6)               | (7)                          | (8)               |
|-------------------------------------------------------|-------------------|-------------------|-------------------|-------------------|-------------------|------------------------------|-------------------|
| K-Wallis-Test: H(7 N=199)=37.4259 p< 10 <sup>-5</sup> |                   |                   |                   |                   |                   |                              |                   |
| <b>Pretest/stressed (1)</b><br>R: 111.93              | ~1.0000<br>0.5444 | ~1.0000<br>0.6337 | ~1.0000<br>0.4745 | 0.2633<br>2.5970  | ~1.0000<br>1.4234 | < 10 <sup>-5</sup><br>4.6516 | ~1.0000<br>0.6270 |
| <b>Pretest/control (2)</b><br>R: 118.20               | --                | ~1.0000<br>1.0452 | ~1.0000<br>0.8860 | 0.0843<br>2.9668  | ~1.0000<br>1.7835 | < 10 <sup>-5</sup><br>5.0214 | ~1.0000<br>0.9968 |
| <b>Test 1/stressed (3)</b><br>R: 102.28               | --                | --                | ~1.0000<br>0.1332 | ~1.0000<br>1.7475 | ~1.0000<br>0.7540 | 0.0122<br>3.5183             | ~1.0000<br>0.0496 |
| <b>Test 1/control (4)</b><br>R: 104.70                | --                | --                | --                | ~1.0000<br>1.8708 | ~1.0000<br>0.8749 | 0.0076<br>3.6416             | ~1.0000<br>0.1728 |
| <b>Test 2/stressed (5)</b><br>R: 67.90                | --                | --                | --                | --                | ~1.0000<br>0.8991 | ~1.0000<br>1.6564            | ~1.0000<br>1.5883 |
| <b>Test 2/control (6)</b><br>R: 87.143                | --                | --                | --                | --                | --                | 0.3223<br>2.5268             | ~1.0000<br>0.6615 |
| <b>Test/stressed (7)</b><br>R: 33.067                 | --                | --                | --                | --                | --                | --                           | 0.0329<br>3.2447  |
| <b>Test/control (8)</b><br>R: 101.30                  | --                | --                | --                | --                | --                | --                           | --                |

**Tab. 1b** refers to data presented in Figure 1b.

p-values of the KOLMOGOROV-SMIRNOV-Test (KS); LILLIFORS-Tests (Lillif) and SHAPIRO-WILK-Test (SW)

| Group    | N  | Std.Dev. | p KS   | p Lillif | p SW     |
|----------|----|----------|--------|----------|----------|
| stressed | 46 | 13.3221  | > 0.20 | < 0.15   | = 0.0224 |
| control  | 51 | 12.0736  | > 0.20 | > 0.20   | = 0.7206 |

Comparison of the unpaired median data by the MANN-WHITNEY-U-Test (MannU) of the walking activity of the stressed and the control group

| Group                | U      | Z       | 2*1 sided exact p |
|----------------------|--------|---------|-------------------|
| stressed vs. control | 772.00 | -2.8971 | 0.0035            |

**Tab. 1c** refers to data presented in Figure 1c.

p-values of the KOLMOGOROV-SMIRNOV-Test (KS); LILLIFORS-Tests (Lillif) and SHAPIRO-WILK-Test (SW)

| Group    | N  | Std.Dev. | p KS   | p Lillif | p SW               |
|----------|----|----------|--------|----------|--------------------|
| stressed | 33 | 233.4105 | < 0.05 | < 0.01   | = 0.0001           |
| control  | 34 | 189.6690 | < 0.05 | < 0.01   | < 10 <sup>-5</sup> |

Comparison of the unpaired median data by the MANN-WHITNEY-U-Test (MannU) of latency time (courtship activity) of the stressed and the control group

| Group                | U      | Z      | 2*1 sided exact p |
|----------------------|--------|--------|-------------------|
| stressed vs. control | 314.50 | 3.0914 | 0.0017            |

**Tab. 1d** refers to data presented in Figure 1d.

p-values of the KOLMOGOROV-SMIRNOV-Test (KS); LILLIFORS-Tests (Lillif) and SHAPIRO-WILK-Test (SW)

| Group    | N  | Std.Dev. | p KS   | p Lillif | p SW               |
|----------|----|----------|--------|----------|--------------------|
| stressed | 63 | 24.5805  | < 0.01 | < 0.01   | < 10 <sup>-5</sup> |
| control  | 74 | 19.1411  | < 0.01 | < 0.01   | < 10 <sup>-5</sup> |

Comparison of the unpaired median data by the MANN-WHITNEY-U-Test (MannU) of light transitions (fast phototaxis) of the stressed and the control group

| Group                | U       | Z      | 2*1 sided exact p |
|----------------------|---------|--------|-------------------|
| stressed vs. control | 2231.50 | 0.4297 | 0.6684            |

**Tab. 1e** refers to data presented in Figure 1e.

p-values of the KOLMOGOROV-SMIRNOV-Test (KS); LILLIFORS-Tests (Lillif) and SHAPIRO-WILK-Test (SW)

| Group    | N  | Std.Dev. | p KS   | p Lillif | p SW     |
|----------|----|----------|--------|----------|----------|
| stressed | 15 | 0.0582   | > 0.20 | > 0.20   | = 0.5690 |
| control  | 15 | 0.0546   | > 0.20 | > 0.20   | = 0.9813 |

Comparison of the normally distributed data by the unpaired T-TEST (K-W) of the optomotor response of the stressed and the control group.

| Group                | T       | F      | p      |
|----------------------|---------|--------|--------|
| stressed vs. control | -0.4531 | 1.1358 | 0.6540 |

Comparison of the unpaired median data by the MANN-WHITNEY-U-Test (MannU) of the optomotor response of the stressed and the control group.

| Group                | U      | Z      | 2*1 sided exact p |
|----------------------|--------|--------|-------------------|
| stressed vs. control | 102.50 | 0.4148 | 0.6827            |

Tab. 1f refers to data presented in Figure 1f.

p-values of the KOLMOGOROV-SMIRNOV-Test (KS); LILLIFORS-Tests (Lillif) and SHAPIRO-WILK-Test (SW)

| Group    | N  | Std.Dev. | p KS  | p Lillif | p SW     |
|----------|----|----------|-------|----------|----------|
| stressed | 30 | 1.4559   | >0.20 | <0.05    | = 0.0232 |
| control  | 30 | 1.7006   | >0.20 | <0.05    | = 0.0188 |

Comparison of the unpaired median data by the MANN-WHITNEY-U-Test (MannU) of the percentage of stops of the stressed and the control group.

| Group                | U      | Z       | 2*1 sided exact p |
|----------------------|--------|---------|-------------------|
| stressed vs. control | 296.00 | -2.2768 | 0.0225            |

Tab. 1g refers to data presented in Figure 1g.

p-values of the KOLMOGOROV-SMIRNOV-Test (KS); LILLIFORS-Tests (Lillif) and SHAPIRO-WILK-Test (SW)

|         | N  | Std.Dev. | p KS   | p Lillif | p SW               |
|---------|----|----------|--------|----------|--------------------|
| Pretest | 45 | 0.7804   | < 0.01 | < 0.01   | < 10 <sup>-5</sup> |
| Stress  | 41 | 1.0927   | < 0.20 | < 0.01   | = 0.0138           |
| Control | 41 | 0.9500   | < 0.01 | < 0.01   | = 0.0002           |

Comparison of the unpaired median data by the MANN-WHITNEY-U-Test (MannU) of climbing attempts of males after courtship suppression and the control group

| Group                                     | (2)              | (3)               |
|-------------------------------------------|------------------|-------------------|
| K-Wallis-Test: H(2 N=127)=4.0942 p=0.1291 |                  |                   |
| Pretest (1)<br>R: 55.633                  | 0.4257<br>1.4688 | 0.2191<br>1.7926  |
| stressed (2)<br>R: 67.305                 | --               | ~1.0000<br>0.3165 |
| control (3)<br>R: 69.878                  | --               | --                |



## Supplementary Table 2 | Statistical analysis for Figure 2.

Tab. 2a refers to data presented in Figure 2a.

p-values of the KOLMOGOROV-SMIRNOV-Test (KS); LILLIFORS-Tests (Lillif) and SHAPIRO-WILK-Test (SW)

|                                                                     | N  | Std.Dev. | p KS   | p Lillif | p SW     |
|---------------------------------------------------------------------|----|----------|--------|----------|----------|
| Pretest<br><i>npf-GAL4</i> > UAS- <i>npf</i> <sup>RNAi</sup>        | 43 | 1.1191   | < 0.15 | < 0.01   | = 0.0012 |
| Pretest<br><i>or83b-GAL4</i> > UAS- <i>npf</i> <sup>RNAi</sup>      | 43 | 1.1157   | < 0.10 | < 0.01   | = 0.0016 |
| Test/Stress<br><i>npf-GAL4</i> > UAS- <i>npf</i> <sup>RNAi</sup>    | 42 | 1.1088   | < 0.15 | < 0.01   | = 0.0091 |
| Test/Stress<br><i>or83b-GAL4</i> > UAS- <i>npf</i> <sup>RNAi</sup>  | 42 | 1.7539   | > 0.20 | < 0.10   | = 0.3305 |
| Test/Control<br><i>npf-GAL4</i> > UAS- <i>npf</i> <sup>RNAi</sup>   | 43 | 1.3753   | < 0.10 | < 0.01   | = 0.0269 |
| Test/Control<br><i>or83b-GAL4</i> > UAS- <i>npf</i> <sup>RNAi</sup> | 42 | 1.4191   | < 0.20 | < 0.01   | = 0.0741 |

Comparison of the unpaired median data by the KRUSKAL-WALLIS-TEST (K-W) of climbing attempts.

Upper row: multiple p-values; lower row: z-values

| Genotype                                                                              | (2)               | (3)                          | (4)                          | (5)                          | (6)                          |
|---------------------------------------------------------------------------------------|-------------------|------------------------------|------------------------------|------------------------------|------------------------------|
| K-Wallis-Test: H(5,N=255)=95.3927 p< 10 <sup>-5</sup>                                 |                   |                              |                              |                              |                              |
| Pretest<br><i>npf-GAL4</i> > UAS- <i>npf</i> <sup>RNAi</sup> (1)<br>R: 169.91         | ~1.0000<br>0.1067 | < 10 <sup>-5</sup><br>7.2547 | < 10 <sup>-5</sup><br>4.9604 | 0.0988<br>2.7172             | ~1.0000<br>0.8312            |
| Pretest<br><i>or83b-GAL4</i> > UAS- <i>npf</i> <sup>RNAi</sup> (2)<br>R: 50.655       | --                | < 10 <sup>-5</sup><br>7.5588 | < 10 <sup>-5</sup><br>5.0665 | 0.0712<br>2.8239             | ~1.0000<br>0.9373            |
| Test(Stress)<br><i>npf-GAL4</i> > UAS- <i>npf</i> <sup>RNAi</sup> (3)<br>R: 126.69    | --                | --                           | 0.1983<br>2.4779             | < 10 <sup>-5</sup><br>4.7516 | < 10 <sup>-5</sup><br>6.5830 |
| Test(Stress)<br><i>or83b-GAL4</i> > UAS- <i>npf</i> <sup>RNAi</sup> (4)<br>R: 171.60  | --                | --                           | --                           | 0.3580<br>2.2592             | 0.0006<br>4.1051             |
| Test(Control)<br><i>npf-GAL4</i> > UAS- <i>npf</i> <sup>RNAi</sup> (5)<br>R: 90.536   | --                | --                           | --                           | --                           | 0.9224<br>1.8699             |
| Test(Control)<br><i>or83b-GAL4</i> > UAS- <i>npf</i> <sup>RNAi</sup> (6)<br>R: 156.61 | --                | --                           | --                           | --                           | --                           |

Tab. 2b refers to data presented in Figure 2b.

p-values of the KOLMOGOROV-SMIRNOV-Test (KS); LILLIFORS-Tests (Lillif) and SHAPIRO-WILK-Test (SW)

|                                                              | N  | Std.Dev. | p KS   | p Lillif | p SW     |
|--------------------------------------------------------------|----|----------|--------|----------|----------|
| Pretest<br><i>npf-GAL4</i> > UAS- <i>npf</i> <sup>cDNA</sup> | 17 | 1.0880   | > 0.20 | < 0.01   | = 0.0064 |
| Pretest<br>CS                                                | 16 | 0.9309   | < 0.15 | < 0.01   | = 0.0203 |
| Test<br><i>npf-GAL4</i> > UAS- <i>npf</i> <sup>cDNA</sup>    | 34 | 1.5786   | > 0.20 | < 0.05   | = 0.1648 |
| Test<br>CS                                                   | 31 | 1.6017   | < 0.15 | < 0.01   | = 0.0635 |

Comparison of the unpaired median data by the KRUSKAL-WALLIS-TEST (K-W) of climbing attempts.

Upper row: multiple p-values; lower row: z-values

| Group                                                                             | (2)               | (3)                          | (4)                          |
|-----------------------------------------------------------------------------------|-------------------|------------------------------|------------------------------|
| K-Wallis-Test: H(3.N=98)=48.2537 p < 10 <sup>-5</sup>                             |                   |                              |                              |
| <b>Pretest/<i>npf</i>-GAL4&gt; UAS-<i>npf</i><sup>cdNA</sup> (1)</b><br>R: 78.412 | ~1.0000<br>0.3129 | < 10 <sup>-5</sup><br>4.7428 | < 10 <sup>-5</sup><br>5.3445 |
| <b>Pretest/CS (2)</b><br>R: 38.353                                                | --                | 0.0001<br>4.2875             | < 10 <sup>-5</sup><br>4.8858 |
| <b>Test / <i>npf</i>-GAL4&gt; UAS-<i>npf</i><sup>cdNA</sup> (3)</b><br>R: 75.313  | --                | --                           | ~1.0000<br>0.8220            |
| <b>Test/CS (4)</b><br>R: 32.548                                                   | --                | --                           | --                           |

**Tab. 2c** refers to data presented in Figure 2c.

p-values of the KOLMOGOROV-SMIRNOV-TEST (KS); LILLIFORS-Tests (Lillif) and SHAPIRO-WILK-TEST (SW)

| Group                                   | N  | Std.Dev. | p KS   | p Lillif | p SW     |
|-----------------------------------------|----|----------|--------|----------|----------|
| <b>Pretest (<i>rut</i><sup>l</sup>)</b> | 51 | 1.0167   | < 0.01 | < 0.01   | = 0.0002 |
| <b>Stress (<i>rut</i><sup>l</sup>)</b>  | 46 | 1.1583   | < 0.10 | < 0.01   | = 0.0111 |
| <b>Control (<i>rut</i><sup>l</sup>)</b> | 42 | 1.2605   | < 0.15 | < 0.01   | = 0.0155 |

Comparison of the unpaired median data by the KRUSKAL-WALLIS-TEST (K-W) of climbing attempts.

Upper row: multiple p-values; lower row: z-values

| Group                                                    | (2)                          | (3)                          |
|----------------------------------------------------------|------------------------------|------------------------------|
| K-Wallis-Test: H(2.N=139)=50.5958 p < 10 <sup>-5</sup>   |                              |                              |
| <b>Pretest (<i>rut</i><sup>l</sup>) (1)</b><br>R: 84.206 | < 10 <sup>-5</sup><br>5.8313 | ~1.0000<br>0.6295            |
| <b>Stress (<i>rut</i><sup>l</sup>) (2)</b><br>R: 36.457  | --                           | < 10 <sup>-5</sup><br>6.1704 |
| <b>Control (<i>rut</i><sup>l</sup>) (3)</b><br>R: 89.488 | --                           | --                           |

**Tab. 2d** refers to data presented in Figure 2d.

p-values of the KOLMOGOROV-SMIRNOV-TEST (KS); LILLIFORS-Tests (Lillif) and SHAPIRO-WILK-TEST (SW)

|                                         | N  | Std.Dev. | p KS   | p Lillif | p SW     |
|-----------------------------------------|----|----------|--------|----------|----------|
| <b>Pretest (<i>dnc</i><sup>l</sup>)</b> | 49 | 1.1173   | < 0.15 | < 0.01   | = 0.0024 |
| <b>Stress (<i>dnc</i><sup>l</sup>)</b>  | 24 | 1.3805   | > 0.20 | < 0.15   | = 0.1513 |
| <b>Control (<i>dnc</i><sup>l</sup>)</b> | 24 | 0.9237   | < 0.10 | < 0.01   | = 0.0093 |

Comparison of the unpaired median data by the KRUSKAL-WALLIS-TEST (K-W) of climbing attempts.

Upper row: multiple p-values; lower row: z-values

| Group                                                    | (2)                          | (3)                          |
|----------------------------------------------------------|------------------------------|------------------------------|
| K-Wallis-Test: H(2.N=97)=51.3956 p < 10 <sup>-5</sup>    |                              |                              |
| <b>Pretest (<i>dnc</i><sup>l</sup>) (1)</b><br>R: 64.347 | < 10 <sup>-5</sup><br>7.0282 | 0.2076<br>0.6295             |
| <b>Stress (<i>dnc</i><sup>l</sup>) (2)</b><br>R: 15.063  | --                           | < 10 <sup>-5</sup><br>4.4975 |
| <b>Control (<i>dnc</i><sup>l</sup>) (3)</b><br>R: 51.604 | --                           | --                           |

### Supplementary Table 3 | Statistical analysis for Figure 3.

**Tab. 3a** refers to data presented in Figure 3a.

p-values of the KOLMOGOROV-SMIRNOV-Test (KS); LILLIFORS-Tests (Lillif) and SHAPIRO-WILK-Test (SW)

|                                     | <b>N</b> | <b>Std.Dev.</b> | <b>p KS</b> | <b>p Lillif</b> | <b>p SW</b> |
|-------------------------------------|----------|-----------------|-------------|-----------------|-------------|
| <b>Pretest stressed</b>             | 19       | 0.8377          | < 0.15      | < 0.01          | = 0.0163    |
| <b>Pretest control</b>              | 18       | 0.8556          | < 0.20      | < 0.10          | = 0.0279    |
| <b>Test 1 stressed</b>              | 17       | 0.8489          | > 0.20      | < 0.05          | = 0.0332    |
| <b>Test 1 control</b>               | 17       | 0.8703          | < 0.15      | < 0.01          | = 0.0295    |
| <b>Test 2 + 50 mM LiCl stressed</b> | 14       | 1.0510          | > 0.20      | < 0.10          | = 0.0516    |
| <b>Test 2 + 50 mM LiCl control</b>  | 15       | 1.1339          | > 0.20      | < 0.05          | = 0.0050    |

Comparison of the unpaired median data by the KRUSKAL-WALLIS-TEST (K-W) of climbing attempts.

Upper row: multiple p-values; lower row: z-values

|                                                      | <b>(2)</b>        | <b>(3)</b>       | <b>(4)</b>        | <b>(5)</b>            | <b>(6)</b>            |
|------------------------------------------------------|-------------------|------------------|-------------------|-----------------------|-----------------------|
| K-Wallis-Test: $H(5, N=100) = 73.6387$ $p < 10^{-3}$ |                   |                  |                   |                       |                       |
| <b>Pretest (1) stressed</b><br>R: 42.00              | ~1.0000<br>0.3190 | 0.0061<br>3.5373 | ~1.0000<br>0.3922 | 0.0029<br>3.7254      | 0.0010<br>3.9995      |
| <b>Pretest (2) control</b><br>R: 40.850              | --                | 0.0022<br>3.8020 | ~1.0000<br>0.0769 | 0.0106<br>3.3878      | 0.0039<br>3.6513      |
| <b>Test (3) stressed</b><br>R: 10.417                | --                | --               | 0.0020<br>3.8247  | < $10^{-3}$<br>6.9078 | < $10^{-3}$<br>7.2332 |
| <b>Test (4) control</b><br>R: 33.150                 | --                | --               | --                | 0.0160<br>3.2729      | 0.0062<br>3.5300      |
| <b>Test + 50mM LiCl (5) stressed</b><br>R: 70.038    | --                | --               | --                | --                    | ~1.0000<br>0.1864     |
| <b>Test + 50mM LiCl (6) control</b><br>R: 65.00      | --                | --               | --                | --                    | --                    |

**Tab. 3b** refers to data presented in Figure 3b.

p-values of the KOLMOGOROV-SMIRNOV-Test (KS); LILLIFORS-Tests (Lillif) and SHAPIRO-WILK-Test (SW)

| <b>Group</b>              | <b>N</b> | <b>Std.Dev.</b> | <b>p KS</b> | <b>p Lillif</b> | <b>p SW</b> |
|---------------------------|----------|-----------------|-------------|-----------------|-------------|
| <b>Pretest stressed</b>   | 21       | 0.8647          | < 0.15      | < 0.01          | = 0.0041    |
| <b>Pretest control</b>    | 21       | 0.8647          | < 0.15      | < 0.10          | = 0.0279    |
| <b>Test stressed</b>      | 21       | 1.1106          | < 0.10      | < 0.01          | = 0.0137    |
| <b>Test 1 control</b>     | 21       | 0.8136          | < 0.10      | < 0.01          | = 0.0116    |
| <b>Test 2 + 5 mM LiCL</b> | 21       | 1.3887          | > 0.20      | > 0.15          | = 0.0343    |

|                                   |    |        |        |        |          |
|-----------------------------------|----|--------|--------|--------|----------|
| <b>stressed</b>                   |    |        |        |        |          |
| <b>Test 2 + 5 mM LiCl control</b> | 19 | 1.2402 | > 0.20 | < 0.05 | = 0.0540 |

Comparison of the unpaired median data by the KRUSKAL-WALLIS-TEST (K-W) of climbing attempts.

Upper row: multiple p-values; lower row: z-values

| <b>Group</b>                                              | <b>(2)</b>                    | <b>(3)</b>                   | <b>(4)</b>                   | <b>(5)</b>        | <b>(6)</b>                   |
|-----------------------------------------------------------|-------------------------------|------------------------------|------------------------------|-------------------|------------------------------|
| K-Wallis-Test: H(5<br>N=100)= 73.6387 p< 10 <sup>-5</sup> |                               |                              |                              |                   |                              |
| <b>Pretest (1)<br/>stressed<br/>R: 42.00</b>              | ~1.0000<br>< 10 <sup>-5</sup> | < 10 <sup>-5</sup><br>5.8755 | ~1.0000<br>1.0583            | ~1.0000<br>1.7903 | ~1.0000<br>0.6519            |
| <b>Pretest (2)<br/>control<br/>R: 40.850</b>              | --                            | < 10 <sup>-5</sup><br>5.8755 | ~1.0000<br>1.0583            | ~1.0000<br>1.7903 | ~1.0000<br>0.6519            |
| <b>Test (3)<br/>stressed<br/>R: 10.417</b>                | --                            | --                           | < 10 <sup>-5</sup><br>4.8172 | 0.0007<br>4.0852  | < 10 <sup>-5</sup><br>5.0748 |
| <b>Test (4)<br/>control<br/>R: 33.150</b>                 | --                            | --                           | --                           | ~1.0000<br>0.7320 | ~1.0000<br>0.3796            |
| <b>Test + 5mM LiCl (5)<br/>stressed<br/>R: 70.038</b>     | --                            | --                           | --                           | --                | ~1.0000<br>1.0931            |
| <b>Test + 5mM LiCl (6)<br/>control<br/>R: 65.00</b>       | --                            | --                           | --                           | --                | --                           |

## Supplementary Table 4 | Statistical analysis for Figure 4

**Tab. 4a** refers to data presented in Figure 4a.

p-values of the KOLMOGOROV-SMIRNOV-Test (KS); LILLIFORS-Tests (Lillif) and SHAPIRO-WILK-Test (SW)

|                                     | <b>N</b> | <b>Std.Dev.</b> | <b>p KS</b> | <b>p Lillif</b> | <b>p SW</b>        |
|-------------------------------------|----------|-----------------|-------------|-----------------|--------------------|
| <b>Pretest</b>                      | 125      | 1.0442          | < 0.01      | < 0.01          | < 10 <sup>-5</sup> |
| <b>Test</b>                         | 125      | 1.1555          | < 0.01      | < 0.01          | < 10 <sup>-5</sup> |
| <b>Test 2 (H<sub>2</sub>O)</b>      | 31       | 1.1188          | < 0.20      | < 0.05          | = 0.0059           |
| <b>Test 2 (5-HTP)</b>               | 30       | 1.5844          | < 0.10      | < 0.01          | = 0.0426           |
| <b>Test 2 (sucrose)</b>             | 30       | 1.4404          | < 0.15      | < 0.01          | = 0.0061           |
| <b>Test 2 (5-HTP &amp; sucrose)</b> | 30       | 1.4223          | < 0.15      | < 0.01          | = 0.0081           |

Comparison of the unpaired median data by the KRUSKAL-WALLIS-TEST (K-W) of climbing attempts.

Upper row: multiple p-values; lower row: z-values

| <b>Group</b>                                            | <b>(2)</b>                    | <b>(3)</b>                | <b>(4)</b>       | <b>(5)</b>                   | <b>(6)</b>                   |
|---------------------------------------------------------|-------------------------------|---------------------------|------------------|------------------------------|------------------------------|
| K-Wallis-Test: H(5 N=371)= 229.9513 p< 10 <sup>-5</sup> |                               |                           |                  |                              |                              |
| <b>Pretest (1)</b><br>R: 279.01                         | < 10 <sup>-5</sup><br>13.4850 | < 10 <sup>-5</sup> 9.1319 | 0.0001<br>4.4548 | 0.1090<br>2.6844             | ~1.0000<br>1.3459            |
| <b>Test (2)</b><br>R: 96.084                            | --                            | ~1.0000<br>0.6305         | 0.0012<br>3.9352 | < 10 <sup>-5</sup><br>5.7056 | < 10 <sup>-5</sup><br>7.0441 |
| <b>Test 2 (H<sub>2</sub>O) (3)</b><br>R: 82.516         | --                            | --                        | 0.0045<br>3.6179 | < 10 <sup>-5</sup><br>5.0232 | < 10 <sup>-5</sup><br>6.0858 |
| <b>Test 2 (5-HTP) (4)</b><br>R: 181.88                  | --                            | --                        | --               | ~1.0000<br>1.3940            | 0.2155<br>2.4479             |
| <b>Test 2 (sucrose) (5)</b><br>R: 220.48                | --                            | --                        | --               | --                           | ~1.0000<br>1.0539            |
| <b>Test 2 (5-HTP+sucrose) (6)</b><br>R: 249.67          | --                            | --                        | --               | --                           | --                           |

**Tab. 4b** refers to data presented in Figure 4b.

p-values of the KOLMOGOROV-SMIRNOV-Test (KS); LILLIFORS-Tests (Lillif) and SHAPIRO-WILK-Test (SW)

|                                | <b>N</b> | <b>Std.Dev.</b> | <b>p KS</b> | <b>p Lillif</b> | <b>p SW</b>        |
|--------------------------------|----------|-----------------|-------------|-----------------|--------------------|
| <b>Pretest</b>                 | 105      | 1.1105          | < 0.01      | < 0.01          | < 10 <sup>-5</sup> |
| <b>Test</b>                    | 103      | 1.3691          | < 0.01      | < 0.01          | = 0.0003           |
| <b>Test 2 (H<sub>2</sub>O)</b> | 24       | 1.3486          | < 0.10      | < 0.01          | = 0.0123           |
| <b>Test 2 (sucrose)</b>        | 25       | 1.1180          | < 0.15      | < 0.01          | = 0.0275           |
| <b>Test 2 (αMTP)</b>           | 26       | 1.5616          | < 0.20      | < 0.01          | = 0.0802           |
| <b>Test 2 (αMTP+sucrose)</b>   | 26       | 1.0325          | > 0.20      | < 0.01          | = 0.0295           |

Comparison of the unpaired median data by the KRUSKAL-WALLIS-TEST (K-W) of climbing attempts.  
Upper row: multiple p-values; lower row: z-values.

| Group                                                   | (2)                           | (3)                          | (4)                          | (5)                          | (6)                          |
|---------------------------------------------------------|-------------------------------|------------------------------|------------------------------|------------------------------|------------------------------|
| K-Wallis-Test: H(5 N=309)=208.8431 p < 10 <sup>-3</sup> |                               |                              |                              |                              |                              |
| <b>Pretest (1)</b><br>R: 279.01                         | < 10 <sup>-5</sup><br>11.2570 | < 10 <sup>-5</sup><br>8.6472 | ~1.0000<br>0.7840            | < 10 <sup>-5</sup><br>8.0892 | < 10 <sup>-5</sup><br>7.8190 |
| <b>Test (2)</b><br>R: 96.084                            | --                            | ~1.0000<br>1.7441            | < 10 <sup>-5</sup><br>6.2195 | ~1.0000<br>0.9606            | ~1.0000<br>0.6909            |
| <b>Test 2 (H<sub>2</sub>O) (3)</b><br>R: 82.516         | --                            | --                           | < 10 <sup>-5</sup><br>6.2356 | ~1.0000<br>0.6517            | ~1.0000<br>0.8608            |
| <b>Test 2 (5-HTP) (4)</b><br>R: 181.88                  | --                            | --                           | --                           | < 10 <sup>-5</sup><br>5.7031 | < 10 <sup>-5</sup><br>5.4918 |
| <b>Test 2 (sucrose) (5)</b><br>R: 220.48                | --                            | --                           | --                           | --                           | ~1.0000<br>0.2431            |
| <b>Test 2 (5-HTP+sucrose) (6)</b><br>R: 249.67          | --                            | --                           | --                           | --                           | --                           |

**Tab. 4c** refers to data presented in Figure 4e.

p-values of the KOLMOGOROV-SMIRNOV-Test (KS); LILLIFORS-Tests (Lillif) and SHAPIRO-WILK-Test (SW).

| Group           | N  | Std.Dev. | p KS   | p Lillif | p SW     |
|-----------------|----|----------|--------|----------|----------|
| <b>stressed</b> | 12 | 0.2386   | > 0.20 | < 0.05   | = 0.1307 |
| <b>control</b>  | 12 | 0.2441   | > 0.20 | > 0.20   | = 0.6657 |

Comparison of the unpaired median data of the 5HT-quantification in the ellipsoid body by the MANN-WHITNEY-U-Test (MannU) of *Drosophila* males of the stressed and control group.

| Group                       | U     | Z       | 2*1 sided exact p |
|-----------------------------|-------|---------|-------------------|
| <b>stressed vs. control</b> | 49.00 | -1.3279 | 0.1978            |

**Tab. 4d** refers to data presented in Figure 4f.

p-values of the KOLMOGOROV-SMIRNOV-Test (KS); LILLIFORS-Tests (Lillif) and SHAPIRO-WILK-Test (SW).

| Group          | N  | Std.Dev. | p KS   | p Lillif | p SW     |
|----------------|----|----------|--------|----------|----------|
| <b>stress</b>  | 12 | 0.4265   | > 0.20 | < 0.15   | = 0.0632 |
| <b>control</b> | 13 | 0.1856   | > 0.20 | < 0.20   | = 0.0653 |

Comparison of the normally distributed data of the 5HT-quantification in the  $\alpha$ -lobe by the unpaired T-TEST of *Drosophila* males of the stressed and control group.

| Group                       | T      | F      | p      |
|-----------------------------|--------|--------|--------|
| <b>stressed vs. control</b> | 2.3142 | 5.2771 | 0.0297 |

Comparison of the unpaired median data of the 5HT-quantification in the  $\alpha$ -lobe by the MANN-WHITNEY-U-Test (MannU) of *Drosophila* males of the stressed and control group.

| Group                       | U     | Z       | 2*1 sided exact p |
|-----------------------------|-------|---------|-------------------|
| <b>stressed vs. control</b> | 40.00 | -2.0669 | 0.0398            |

**Tab. 4e** refers to data presented in Figure 4g.

p-values of the KOLMOGOROV-SMIRNOV-Test (KS); LILLIFORS-Tests (Lillif) and SHAPIRO-WILK-Test (SW).

| Group           | N  | Std.Dev. | p KS   | p Lillif | p SW     |
|-----------------|----|----------|--------|----------|----------|
| <b>stressed</b> | 13 | 0.1717   | > 0.20 | > 0.20   | = 0.8165 |
| <b>control</b>  | 12 | 0.3861   | > 0.20 | > 0.20   | = 0.8753 |

Comparison of the normally distributed data of the 5HT-quantification in the  $\beta$ -lobe by the unpaired T-TEST of *Drosophila* males of the stressed and control group.

| Group                | T       | F      | p      |
|----------------------|---------|--------|--------|
| stressed vs. control | -1.1871 | 5.0543 | 0.2473 |

Comparison of the unpaired median data of the 5HT-quantification in the  $\beta$ -lobe by the MANN-WHITNEY-U-Test (MannU) of *Drosophila* males of the stressed and control group.

| Group                | U     | Z      | 2*1 sided exact p |
|----------------------|-------|--------|-------------------|
| stressed vs. control | 64.00 | 0.7615 | 0.4696            |

**Tab. 4f** refers to data presented in Figure 4h.

p-values of the KOLMOGOROV-SMIRNOV-Test (KS); LILLIFORS-Tests (Lillif) and SHAPIRO-WILK-Test (SW)

| Group    | N  | Std.Dev. | p KS   | p Lillif | p SW     |
|----------|----|----------|--------|----------|----------|
| stressed | 13 | 0.1555   | > 0.20 | < 0.15   | = 0.0040 |
| control  | 12 | 0.4826   | > 0.20 | > 0.20   | = 0.3733 |

Comparison of the unpaired median data of the 5HT-quantification in the  $\gamma$ -lobe by the MANN-WHITNEY-U-Test (MannU) of *Drosophila* males of the stressed and control group.

| Group                | U     | Z      | 2*1 sided exact p |
|----------------------|-------|--------|-------------------|
| stressed vs. control | 71.00 | 0.6923 | 0.5114            |

## Supplementary Table 5 | Statistical analysis for Figure 5.

**Tab. 5a** refers to data presented in Figure 5a.

p-values of the KOLMOGOROV-SMIRNOV-Test (KS); LILLIFORS-Tests (Lillif) and SHAPIRO-WILK-Test (SW).

| Group                                             | N  | Std.Dev. | p KS   | p Lillif | p SW     |
|---------------------------------------------------|----|----------|--------|----------|----------|
| Pretest<br><i>Trh493-GAL4&gt; UAS-TNT</i>         | 23 | 0.8528   | < 0.01 | < 0.01   | = 0.0003 |
| Pretest<br>UAS-TNT/+                              | 25 | 0.8124   | < 0.10 | < 0.01   | = 0.0026 |
| Test (stressed)<br><i>Trh493-GAL4&gt; UAS-TNT</i> | 23 | 1.3112   | > 0.20 | < 0.05   | = 0.1251 |
| Test (stressed)<br>UAS-TNT/+                      | 24 | 1.1672   | < 0.15 | < 0.01   | = 0.0038 |
| Test (sucrose)<br><i>Trh493-GAL4&gt; UAS-TNT</i>  | 23 | 1.2777   | > 0.20 | < 0.01   | = 0.0310 |
| Test (sucrose)<br>UAS-TNT/+                       | 25 | 0.8524   | < 0.10 | < 0.01   | = 0.0060 |

Comparison of the unpaired median data by the KRUSKAL-WALLIS-TEST (K-W) of climbing attempts.

Upper row: multiple p-values; lower row: z-values.

| Genotype                                                           | (2)               | (3)                          | (4)                          | (5)                          | (6)                          |
|--------------------------------------------------------------------|-------------------|------------------------------|------------------------------|------------------------------|------------------------------|
| K-Wallis-Test: H(5 N=143)=103.5219 p < 10 <sup>-5</sup>            |                   |                              |                              |                              |                              |
| Pretest (1)<br><i>Trh493-GAL4&gt; UAS-TNT</i><br>R: 107.24         | ~1.0000<br>0.2374 | < 10 <sup>-5</sup><br>5.7749 | < 10 <sup>-5</sup><br>6.2262 | < 10 <sup>-5</sup><br>5.3425 | ~1.0000<br>0.6032            |
| Pretest (2)<br>UAS-TNT/+<br>R: 110.08                              | --                | < 10 <sup>-5</sup><br>6.1314 | < 10 <sup>-5</sup><br>6.5974 | < 10 <sup>-5</sup><br>5.6900 | ~1.0000<br>0.8586            |
| Test (stressed) (3)<br><i>Trh493-GAL4&gt; UAS-TNT</i><br>R: 36.696 | --                | --                           | ~1.0000<br>0.3902            | ~1.0000<br>0.4325            | < 10 <sup>-5</sup><br>5.2908 |
| Test (stressed) (4)<br>UAS-TNT/+<br>R: 31.979                      | --                | --                           | --                           | ~1.0000<br>0.8272            | < 10 <sup>-5</sup><br>5.7476 |
| Test (sucrose) (5)<br><i>Trh493-GAL4&gt; UAS-TNT</i><br>R: 41.978  | --                | --                           | --                           | --                           | < 10 <sup>-5</sup><br>4.8495 |
| Test (sucrose) (6)<br>UAS-TNT/+<br>R: 100.02                       | --                | --                           | --                           | --                           | --                           |



**Tab. 5b** refers to data presented in Figure 5b.

p-values of the KOLMOGOROV-SMIRNOV-Test (KS); LILLIFORS-Tests (Lillif) and SHAPIRO-WILK-Test (SW).

| Group                                                     | N  | Std.Dev. | p KS   | p Lillif | p SW               |
|-----------------------------------------------------------|----|----------|--------|----------|--------------------|
| Pretest<br><i>Trh493-GAL4&gt; UAS-NaChBac</i>             | 45 | 0.7433   | < 0.01 | < 0.01   | < 10 <sup>-5</sup> |
| Pretest<br>UAS-NaChBac/+                                  | 44 | 0.9634   | < 0.01 | < 0.01   | = 0.0005           |
| Test (stressed)<br><i>Trh493-GAL4&gt; UAS-NaChBac</i>     | 43 | 1.1206   | < 0.05 | < 0.01   | = 0.0021           |
| Test (stressed)<br>UAS-NaChBac/+                          | 44 | 1.2449   | < 0.15 | < 0.01   | = 0.0212           |
| Test (sucrose)<br><i>Trh493-GAL4&gt; UAS-NaChBac</i>      | 20 | 0.8645   | < 0.10 | < 0.01   | = 0.0055           |
| Test (sucrose)<br>UAS-NaChBac/+                           | 22 | 1.1622   | > 0.20 | < 0.05   | = 0.0622           |
| Test (sucrose+αMTP)<br><i>Trh493-GAL4&gt; UAS-NaChBac</i> | 21 | 1.0282   | > 0.20 | < 0.05   | = 0.0215           |
| Test (sucrose+αMTP)<br>UAS-NaChBac/+                      | 21 | 0.9636   | > 0.20 | < 0.05   | = 0.0531           |

Comparison of the unpaired median data by the KRUSKAL-WALLIS-TEST (K-W) of climbing attempts.

Upper row: multiple p-values; lower row: z-values.

| Genotype                                                                  | (2)               | (3)               | (4)                          | (5)                          | (6)                          | (7)                          | (8)                          |
|---------------------------------------------------------------------------|-------------------|-------------------|------------------------------|------------------------------|------------------------------|------------------------------|------------------------------|
| K-Wallis-Test: H(7 N=260)=152.0367 p< 10 <sup>-5</sup>                    |                   |                   |                              |                              |                              |                              |                              |
| Pretest (1)<br><i>Trh493-GAL4&gt; UAS-NaChBac</i><br>R: 167.43            | ~1.0000<br>0.8737 | ~1.0000<br>1.0494 | ~1.0000<br>6.9851            | ~1.0000<br>0.1835            | ~1.0000<br>1.1466            | < 10 <sup>-5</sup><br>5.7413 | < 10 <sup>-5</sup><br>6.2661 |
| Pretest (2)<br>UAS-NaChBac/+<br>R: 181.36                                 | --                | ~1.0000<br>1.9075 | < 10 <sup>-5</sup><br>7.8150 | ~1.0000<br>0.8698            | ~1.0000<br>0.4329            | < 10 <sup>-5</sup><br>6.4191 | < 10 <sup>-5</sup><br>6.9420 |
| Test (stress) (3)<br><i>Trh493-GAL4&gt; UAS-NaChBac</i><br>R: 150.60      | --                | --                | < 10 <sup>-5</sup><br>5.8625 | ~1.0000<br>0.6446            | ~1.0000<br>1.9916            | < 10 <sup>-5</sup><br>4.8587 | < 10 <sup>-5</sup><br>5.3796 |
| Test (stress) (4)<br>UAS-NaChBac/+<br>R: 56.068                           | --                | --                | --                           | < 10 <sup>-5</sup><br>5.3086 | < 10 <sup>-5</sup><br>6.8138 | ~1.0000<br>0.1371            | ~1.0000<br>0.6600            |
| Test (sucrose) (5)<br><i>Trh493-GAL4&gt; UAS-NaChBac</i><br>R: 163.72     | --                | --                | --                           | --                           | ~1.0000<br>1.1250            | 0.0001<br>4.6984             | < 10 <sup>-5</sup><br>5.1423 |
| Test (sucrose) (6)<br>UAS-NaChBac/+<br>R: 189.86                          | --                | --                | --                           | --                           | --                           | < 10 <sup>-5</sup><br>5.9511 | < 10 <sup>-5</sup><br>6.4057 |
| Test (sucrose+αMTP) (7)<br><i>Trh493-GAL4&gt; UAS-NaChBac</i><br>R: 53.33 | --                | --                | --                           | --                           | --                           | --                           | ~1.0000<br>0.4494            |
| Test (sucrose+αMTP) (8)<br>UAS-NaChBac/+<br>R: 42.905                     | --                | --                | --                           | --                           | --                           | --                           | --                           |

**Tab. 5c** refers to data presented in Figure 5f.

p-values of the KOLMOGOROV-SMIRNOV-Test (KS); LILLIFORS-Tests (Lillif) and SHAPIRO-WILK-Test (SW).

|                                               | <b>N</b> | <b>Std.Dev.</b> | <b>p KS</b> | <b>p Lillif</b> | <b>p SW</b> |
|-----------------------------------------------|----------|-----------------|-------------|-----------------|-------------|
| <b>Pretest</b><br><i>mb247-GAL4</i> > UAS-TNT | 46       | 0.9631          | < 0.05      | < 0.01          | = 0.0012    |
| <b>Pretest</b><br>UAS-TNT/+                   | 25       | 0.8124          | < 0.10      | < 0.01          | = 0.0026    |
| <b>Pretest</b><br><i>mb247-GAL4</i> +         | 23       | 0.9154          | < 0.15      | < 0.01          | = 0.0107    |
| <b>Test</b><br><i>mb247-GAL4</i> > UAS-TNT    | 42       | 1.1527          | < 0.01      | < 0.01          | = 0.0028    |
| <b>Test</b><br>UAS-TNT/+                      | 24       | 1.1672          | < 0.15      | < 0.01          | = 0.0038    |
| <b>Test</b><br><i>mb247-GAL4</i> +            | 23       | 1.5258          | > 0.20      | < 0.05          | = 0.1750    |

Comparison of the unpaired median data by the KRUSKAL-WALLIS-TEST (K-W) of climbing attempts.

Upper row: multiple p-values; lower row: z-values.

| <b>Genotype</b>                                                | <b>(2)</b>       | <b>(3)</b>        | <b>(4)</b>        | <b>(5)</b>                   | <b>(6)</b>                   |
|----------------------------------------------------------------|------------------|-------------------|-------------------|------------------------------|------------------------------|
| K-Wallis-Test: H(5 N=183)=92.5351 p < 10 <sup>-5</sup>         |                  |                   |                   |                              |                              |
| <b>Pretest (1)</b><br><i>mb247-GAL4</i> > UAS-TNT<br>R: 122.83 | 0.8440<br>1.9090 | ~1.0000<br>0.1736 | ~1.0000<br>1.8148 | < 10 <sup>-5</sup><br>7.8870 | < 10 <sup>-5</sup><br>5.4011 |
| <b>Pretest (2)</b><br>UAS-TNT/+<br>R: 97.70                    | --               | ~1.0000<br>1.7951 | ~1.0000<br>0.3445 | < 10 <sup>-5</sup><br>5.2897 | 0.0260<br>3.1323             |
| <b>Pretest (3)</b><br><i>+/mb247-GAL4</i><br>R: 125.17         | --               | --                | ~1.0000<br>1.6640 | < 10 <sup>-5</sup><br>6.9580 | < 10 <sup>-5</sup><br>4.8278 |
| <b>Test (4)</b><br><i>mb247-GAL4</i> > UAS-TNT<br>R: 102.31    | --               | --                | --                | < 10 <sup>-5</sup><br>6.2477 | 0.0020<br>3.8243             |
| <b>Test (5)</b><br>UAS-TNT/+<br>R: 17.625                      | --               | --                | --                | --                           | 0.5642<br>2.0791             |
| <b>Test (6)</b><br><i>+/mb247-GAL4</i><br>R: 49.761            | --               | --                | --                | --                           | --                           |

**Tab. 5d** refers to data presented in Figure 5g.

p-values of the KOLMOGOROV-SMIRNOV-Test (KS); LILLIFORS-Tests (Lillif) and SHAPIRO-WILK-Test (SW).

| <b>Group</b>                                | <b>N</b> | <b>Std.Dev.</b> | <b>p KS</b> | <b>p Lillif</b> | <b>p SW</b> |
|---------------------------------------------|----------|-----------------|-------------|-----------------|-------------|
| <b>Pretest</b><br><i>H24-GAL4</i> > UAS-TNT | 22       | 0.9726          | > 0.20      | < 0.05          | = 0.0097    |
| <b>Pretest</b><br>UAS-TNT/+                 | 25       | 0.8124          | < 0.10      | < 0.01          | = 0.0026    |
| <b>Pretest</b><br><i>+/H24-GAL4</i>         | 22       | 0.7799          | < 0.10      | < 0.01          | = 0.0059    |
| <b>Test</b><br><i>H24-GAL4</i> > UAS-TNT    | 22       | 1.2239          | > 0.20      | < 0.10          | = 0.0290    |
| <b>Test</b><br>UAS-TNT/+                    | 24       | 1.1672          | < 0.15      | < 0.01          | = 0.0038    |
| <b>Test</b><br><i>+/H24-GAL4</i>            | 22       | 0.2868          | < 0.15      | < 0.01          | = 0.0548    |

Comparison of the unpaired median data by the KRUSKAL-WALLIS-TEST (K-W) of climbing attempts.  
Upper row: multiple p-values; lower row: z-values.

| Genotype                                                     | (2)               | (3)               | (4)               | (5)                          | (6)                          |
|--------------------------------------------------------------|-------------------|-------------------|-------------------|------------------------------|------------------------------|
| K-Wallis-Test: H(5 N=137)=83.3922 p< 10 <sup>-5</sup>        |                   |                   |                   |                              |                              |
| <b>Pretest (1)</b><br><i>H24-GAL4</i> > UAS-TNT<br>R: 94.636 | ~1.0000<br>0.3358 | ~1.0000<br>0.2906 | ~1.0000<br>1.6047 | < 10 <sup>-5</sup><br>6.3635 | ~1.0000<br>4.8596            |
| <b>Pretest (2)</b><br>UAS-TNT/+<br>R: 90.740                 | --                | ~1.0000<br>0.6355 | ~1.0000<br>1.3193 | < 10 <sup>-5</sup><br>6.2290 | < 10 <sup>-5</sup><br>4.6765 |
| <b>Pretest (3)</b><br>+/ <i>H24-GAL4</i><br>R: 98.114        | --                | --                | 0.8709<br>1.8952  | < 10 <sup>-5</sup><br>6.6603 | < 10 <sup>-5</sup><br>5.1502 |
| <b>Test (4)</b><br><i>H24-GAL4</i> > UAS-TNT<br>R: 75.432    | --                | --                | --                | < 10 <sup>-5</sup><br>4.7243 | 0.0170<br>3.2550             |
| <b>Test (5)</b><br>UAS-TNT/+<br>R: 20.083                    | --                | --                | --                | --                           | ~1.0000<br>1.3993            |
| <b>Test (6)</b><br>+/ <i>H24-GAL4</i><br>R: 36.477           | --                | --                | --                | --                           | --                           |

**Tab. 5e** refers to data presented in Figure 5h.

p-values of the KOLMOGOROV-SMIRNOV-Test (KS); LILLIFORS-Tests (Lillif) and SHAPIRO-WILK-Test (SW).

| Group                                                 | N  | Std.Dev. | p KS   | p Lillif | p SW     |
|-------------------------------------------------------|----|----------|--------|----------|----------|
| <b>Pretest</b><br><i>c739-GAL4</i> > UAS-TNT          | 21 | 1.1402   | < 0.15 | < 0.01   | = 0.0220 |
| <b>Pretest</b><br>UAS-TNT/+                           | 25 | 0.8124   | < 0.10 | < 0.01   | = 0.0026 |
| <b>Pretest</b><br>+/ <i>c739-GAL4</i>                 | 21 | 0.8891   | < 0.15 | < 0.01   | = 0.0074 |
| <b>Test</b><br><i>c739-GAL4</i> > UAS-TNT             | 21 | 1.1792   | > 0.20 | < 0.05   | = 0.0850 |
| <b>Test</b><br>UAS-TNT/+                              | 25 | 1.1672   | < 0.15 | < 0.01   | = 0.0038 |
| <b>Test</b><br>+/ <i>c739-GAL4</i>                    | 21 | 0.9487   | < 0.20 | < 0.01   | = 0.0712 |
| <b>Test 2 (sucrose)</b><br><i>c739-GAL4</i> > UAS-TNT | 21 | 1.3002   | > 0.20 | < 0.05   | = 0.0671 |
| <b>Test 2 (sucrose)</b><br>UAS-TNT/+                  | 25 | 0.8524   | < 0.10 | < 0.01   | = 0.0060 |
| <b>Test 2 (sucrose)</b><br>+/ <i>c739-GAL4</i>        | 21 | 0.8647   | < 0.15 | < 0.01   | = 0.0032 |

Comparison of the unpaired median data by the KRUSKAL-WALLIS-TEST (K-W) of climbing attempts.  
 Upper row: multiple p-values; lower row: z-values.

| Genotype                                                                 | (2)               | (3)               | (4)                          | (5)                          | (6)                          | (7)                          | (8)                          | (9)                          |
|--------------------------------------------------------------------------|-------------------|-------------------|------------------------------|------------------------------|------------------------------|------------------------------|------------------------------|------------------------------|
| K-Wallis-Test: H(8 N=200)=141.2200 p< 10 <sup>-5</sup>                   |                   |                   |                              |                              |                              |                              |                              |                              |
| <b>Pretest (1)</b><br><i>c739-GAL4&gt; UAS-TNT</i><br>R: 146.10          | ~1.0000<br>0.3482 | ~1.0000<br>0.3292 | < 10 <sup>-5</sup><br>5.7504 | < 10 <sup>-5</sup><br>6.0430 | < 10 <sup>-5</sup><br>5.4892 | < 10 <sup>-5</sup><br>5.2279 | ~1.0000<br>0.4842            | ~1.0000<br>0.6718            |
| <b>Pretest (2)</b><br><i>UAS-TNT/+</i><br>R: 152.06                      | --                | ~1.0000<br>0.6914 | < 10 <sup>-5</sup><br>6.3434 | < 10 <sup>-5</sup><br>6.6792 | < 10 <sup>-5</sup><br>6.0710 | < 10 <sup>-5</sup><br>5.7986 | ~1.0000<br>0.8711            | ~1.0000<br>1.0486            |
| <b>Pretest (3)</b><br><i>c739-GAL4/+</i><br>R: 140.21                    | --                | --                | < 10 <sup>-5</sup><br>5.4212 | < 10 <sup>-5</sup><br>5.7030 | < 10 <sup>-5</sup><br>5.1600 | < 10 <sup>-5</sup><br>4.8987 | ~1.0000<br>0.1409            | ~1.0000<br>0.3426            |
| <b>Test (4)</b><br><i>c739-GAL4&gt; UAS-TNT</i><br>R: 43.381             | --                | --                | --                           | ~1.0000<br>0.1039            | ~1.0000<br>0.2613            | ~1.0000<br>0.5225            | < 10 <sup>-5</sup><br>5.5111 | < 10 <sup>-5</sup><br>5.0786 |
| <b>Test (5)</b><br><i>UAS-TNT/+</i><br>R: 41.583                         | --                | --                | --                           | --                           | ~1.0000<br>0.3738            | ~1.0000<br>0.6436            | < 10 <sup>-5</sup><br>5.8171 | < 10 <sup>-5</sup><br>5.3491 |
| <b>Test (6)</b><br><i>c739-GAL4/+</i><br>R: 48.048                       | --                | --                | --                           | --                           | --                           | ~1.0000<br>0.2613            | < 10 <sup>-5</sup><br>5.2387 | < 10 <sup>-5</sup><br>4.8174 |
| <b>Test 2 (sucrose) (7)</b><br><i>c739-GAL4&gt; UAS-TNT</i><br>R: 52.714 | --                | --                | --                           | --                           | --                           | --                           | < 10 <sup>-5</sup><br>4.9663 | 0.0002<br>4.5561             |
| <b>Test 2 (sucrose) (8)</b><br><i>UAS-TNT/+</i><br>R: 137.80             | --                | --                | --                           | --                           | --                           | --                           | --                           | ~1.0000<br>0.2162            |
| <b>Test 2 (sucrose) (9)</b><br><i>c739-GAL4/+</i><br>R: 134.10           | --                | --                | --                           | --                           | --                           | --                           | --                           | --                           |

## Supplementary Table 6 | Statistical analysis for Figure 6.

Tab. 6a refers to data presented in Figure 6a.

p-values of the KOLMOGOROV-SMIRNOV-Test (KS); LILLIFORS-Tests (Lillif) and SHAPIRO-WILK-Test (SW).

| Group                                                              | N  | Std.Dev. | p KS   | p Lillif | p SW               |
|--------------------------------------------------------------------|----|----------|--------|----------|--------------------|
| Pretest<br><i>mb247-GAL4</i> > UAS-5HT-1A <sup>RNAi</sup>          | 52 | 0.8042   | < 0.01 | < 0.01   | < 10 <sup>-5</sup> |
| Pretest<br>UAS-5HT-1A <sup>RNAi/+</sup>                            | 52 | 0.7794   | < 0.01 | < 0.01   | < 10 <sup>-5</sup> |
| Pretest<br>+/mb247-GAL4                                            | 52 | 0.8975   | < 0.01 | < 0.01   | = 0.0001           |
| Test<br><i>mb247-GAL4</i> > UAS-5HT-1A <sup>RNAi</sup>             | 26 | 1.3633   | > 0.20 | < 0.10   | = 0.1371           |
| Test<br>UAS-5HT-1A <sup>RNAi/+</sup>                               | 26 | 1.2026   | > 0.20 | < 0.05   | = 0.1197           |
| Test<br>+/mb247-GAL4                                               | 26 | 1.5237   | < 0.15 | < 0.01   | = 0.0795           |
| Test 2 (sucrose)<br><i>mb247-GAL4</i> > UAS-5HT-1A <sup>RNAi</sup> | 26 | 1.2508   | < 0.10 | < 0.01   | = 0.0645           |
| Test 2 (sucrose)<br>UAS-5HT-1A <sup>RNAi/+</sup>                   | 24 | 1.1034   | > 0.20 | < 0.01   | = 0.0185           |
| Test 2 (sucrose)<br>+/mb247-GAL4                                   | 26 | 1.2102   | < 0.10 | < 0.01   | = 0.0174           |

Comparison of the unpaired median data by the KRUSKAL-WALLIS-TEST (K-W) of climbing attempts.

Upper row: multiple p-values; lower row: z-values.

| Genotype                                                                       | (2)               | (3)               | (4)                          | (5)                          | (6)                          | (7)                          | (8)                          | (9)                          |
|--------------------------------------------------------------------------------|-------------------|-------------------|------------------------------|------------------------------|------------------------------|------------------------------|------------------------------|------------------------------|
| K-Wallis-Test: H(8 N=310)=152.6476 p < 10 <sup>-5</sup>                        |                   |                   |                              |                              |                              |                              |                              |                              |
| Pretest (1)<br><i>mb247-GAL4</i> > 5HT1A <sup>RNAi</sup><br>R: 187.84          | ~1.0000<br>0.2773 | ~1.0000<br>0.9354 | < 10 <sup>-5</sup><br>5.1991 | < 10 <sup>-5</sup><br>5.5073 | < 10 <sup>-5</sup><br>5.5555 | < 10 <sup>-5</sup><br>5.6475 | ~1.0000<br>1.3627            | ~1.0000<br>0.7284            |
| Pretest (2)<br>UAS-5HT1A <sup>RNAi/+</sup><br>R: 192.71                        | --                | ~1.0000<br>0.6580 | < 10 <sup>-5</sup><br>5.4255 | < 10 <sup>-5</sup><br>5.7337 | < 10 <sup>-5</sup><br>5.7819 | < 10 <sup>-5</sup><br>5.8739 | ~1.0000<br>1.1423            | ~1.0000<br>0.5020            |
| Pretest (3)<br><i>mb247-GAL4</i> /+<br>R: 204.28                               | --                | --                | < 10 <sup>-5</sup><br>5.9628 | < 10 <sup>-5</sup><br>6.2710 | < 10 <sup>-5</sup><br>6.3193 | < 10 <sup>-5</sup><br>6.4112 | ~1.0000<br>0.6194            | ~1.0000<br>0.0353            |
| Test (4)<br><i>mb247-GAL4</i> > 5HT1A <sup>RNAi</sup><br>R: 75.904             | --                | --                | --                           | ~1.0000<br>0.2669            | ~1.0000<br>0.3087            | ~1.0000<br>0.3883            | < 10 <sup>-5</sup><br>5.5996 | < 10 <sup>-5</sup><br>5.1334 |
| Test (5)<br>UAS-5HT1A <sup>RNAi/+</sup><br>R: 69.269                           | --                | --                | --                           | --                           | ~1.0000<br>0.0418            | ~1.0000<br>0.1215            | < 10 <sup>-5</sup><br>5.8611 | < 10 <sup>-5</sup><br>5.4003 |
| Test (6)<br><i>mb247-GAL4</i> /+<br>R: 68.231                                  | --                | --                | --                           | --                           | --                           | ~1.0000<br>0.0797            | < 10 <sup>-5</sup><br>5.9020 | < 10 <sup>-5</sup><br>5.4420 |
| Test 2 (sucrose) (7)<br><i>mb247-GAL4</i> > 5HT1A <sup>RNAi</sup><br>R: 66.250 | --                | --                | --                           | --                           | --                           | --                           | < 10 <sup>-5</sup><br>5.9801 | < 10 <sup>-5</sup><br>5.5217 |
| Test 2 (sucrose) (8)<br>UAS-5HT1A <sup>RNAi/+</sup><br>R: 217.98               | --                | --                | --                           | --                           | --                           | --                           | --                           | ~1.0000<br>0.5699            |
| Test 2 (sucrose) (9)<br><i>mb247-GAL4</i> /+<br>R: 203.52                      | --                | --                | --                           | --                           | --                           | --                           | --                           | --                           |

**Tab. 6b** refers to data presented in Figure 6b.

p-values of the KOLMOGOROV-SMIRNOV-Test (KS); LILLIFORS-Tests (Lillif) and SHAPIRO-WILK-Test (SW).

| Genotype                                                           | N  | Std.Dev. | p KS   | p Lillif | p SW               |
|--------------------------------------------------------------------|----|----------|--------|----------|--------------------|
| Pretest<br><i>mb247-GAL4</i> > UAS-5HT-1B <sup>RNAi</sup>          | 50 | 0.7890   | < 0.05 | < 0.01   | < 10 <sup>-5</sup> |
| Pretest<br>UAS-5HT-1B <sup>RNAi/+</sup>                            | 50 | 0.7273   | < 0.01 | < 0.01   | < 10 <sup>-5</sup> |
| Pretest<br>+/ <i>mb247-GAL4</i>                                    | 52 | 0.8975   | < 0.01 | < 0.01   | = 0.0001           |
| Test<br><i>mb247-GAL4</i> > UAS-5HT-1B <sup>RNAi</sup>             | 24 | 1.0206   | < 0.10 | < 0.01   | = 0.0206           |
| Test<br>UAS-5HT-1B <sup>RNAi/+</sup>                               | 26 | 1.2006   | > 0.20 | < 0.05   | = 0.1340           |
| Test<br>+/ <i>mb247-GAL4</i>                                       | 26 | 1.5237   | < 0.15 | < 0.01   | = 0.0795           |
| Test 2 (sucrose)<br><i>mb247-GAL4</i> > UAS-5HT-1B <sup>RNAi</sup> | 24 | 1.3270   | > 0.20 | < 0.15   | = 0.1000           |
| Test 2 (sucrose)<br>UAS-5HT-1B <sup>RNAi/+</sup>                   | 25 | 1.0985   | > 0.20 | < 0.01   | = 0.0075           |
| Test 2 (sucrose)<br>+/ <i>mb247-GAL4</i>                           | 26 | 1.2102   | < 0.10 | < 0.01   | = 0.0174           |

Comparison of the unpaired median data by the KRUSKAL-WALLIS-TEST (K-W) of climbing attempts; data separated according to different days. Upper row: multiple p-values; lower row: z-values.

| Genotype                                                                   | (2)                          | (3)              |
|----------------------------------------------------------------------------|------------------------------|------------------|
| K-Wallis-Test: H(2 N=152)=30.7643 p< 10 <sup>-5</sup>                      |                              |                  |
| Pretest (1)<br><i>mb247-GAL4</i> > UAS-5HT-1B <sup>RNAi</sup><br>R: 94.130 | < 10 <sup>-5</sup><br>4.9849 | 0.8535<br>1.0702 |
| Pretest (2)<br>UAS-5HT-1B <sup>RNAi/+</sup><br>R: 50.240                   | --                           | 0.0002<br>3.9633 |
| Pretest (3)<br>+/ <i>mb247-GAL4</i><br>R: 84.798                           | --                           | --               |

| Genotype                                                                | (2)                          | (3)              |
|-------------------------------------------------------------------------|------------------------------|------------------|
| K-Wallis-Test: H(2 N=76)=28.0599 p< 10 <sup>-5</sup>                    |                              |                  |
| Test (1)<br><i>mb247-GAL4</i> > UAS-5HT-1B <sup>RNAi</sup><br>R: 56.146 | < 10 <sup>-5</sup><br>5.1855 | 0.0065<br>3.0659 |
| Test (2)<br>UAS-5HT-1B <sup>RNAi/+</sup><br>R: 23.731                   | --                           | 0.0915<br>2.1633 |
| Test (3)<br>+/ <i>mb247-GAL4</i><br>R: 36.981                           | --                           | --               |

| Genotype                                                                            | (2)               | (3)              |
|-------------------------------------------------------------------------------------|-------------------|------------------|
| K-Wallis-Test: H(2 N=75)=7.3992 p=0.0247                                            |                   |                  |
| Test 2 (sucrose) (1)<br><i>mb247-GAL4</i> > UAS-5HT-1B <sup>RNAi</sup><br>R: 31.083 | ~1.0000<br>0.7220 | 0.0339<br>2.5332 |
| Test 2 (sucrose) (2)<br>UAS-5HT-1B <sup>RNAi/+</sup><br>R: 35.580                   | --                | 0.2947<br>1.8234 |
| Test 2 (sucrose) (3)<br>+/ <i>mb247-GAL4</i><br>R: 46.712                           | --                | --               |

**Tab. 6c** refers to data presented in Figure 6c.

p-values of the KOLMOGOROV-SMIRNOV-Test (KS); LILLIFORS-Tests (Lillif) and SHAPIRO-WILK-Test (SW).

| Genotype                                                                 | N  | Std.Dev. | p KS   | p Lillif | p SW     |
|--------------------------------------------------------------------------|----|----------|--------|----------|----------|
| Pretest<br><i>H24-GAL4&gt; 5HT1A<sup>RNAi</sup></i>                      | 25 | 0.8660   | < 0.05 | < 0.01   | = 0.0037 |
| Pretest<br><i>c739-GAL4&gt; 5HT1A<sup>RNAi</sup></i>                     | 25 | 0.8660   | < 0.05 | < 0.01   | = 0.0037 |
| Test 1<br><i>H24-GAL4&gt; 5HT1A<sup>RNAi</sup></i><br>Stressed           | 23 | 0.9472   | < 0.10 | < 0.01   | = 0.0077 |
| Test 1<br><i>c739-GAL4&gt; 5HT1A<sup>RNAi</sup></i><br>Stressed          | 25 | 1.0924   | < 0.10 | < 0.01   | = 0.0095 |
| Test 2 (Sucrose)<br><i>H24-GAL4&gt; 5HT1A<sup>RNAi</sup></i><br>Stressed | 20 | 0.8256   | < 0.15 | < 0.01   | = 0.0145 |
| Test 2 (Sucrose)<br><i>c739-GAL4&gt;5HT1A<sup>RNAi</sup></i><br>Stressed | 25 | 1.2083   | > 0.20 | < 0.01   | = 0.0371 |

Comparison of the unpaired median data by the KRUSKAL-WALLIS-TEST (K-W).

Upper row: multiple p-values; lower row: z-values.

| Genotyp                                                                                 | (2)                           | (3)                          | (4)                          | (5)                          | (6)                          |
|-----------------------------------------------------------------------------------------|-------------------------------|------------------------------|------------------------------|------------------------------|------------------------------|
| K-Wallis-Test: H(5 N=143)= 106.6746 p< 10 <sup>-5</sup>                                 |                               |                              |                              |                              |                              |
| Pretest (1)<br><i>H24-GAL4&gt; 5HT1A<sup>RNAi</sup></i><br>R: 105.92                    | ~1.0000<br>< 10 <sup>-5</sup> | < 10 <sup>-5</sup><br>5.0427 | < 10 <sup>-5</sup><br>5.8259 | ~1.0000<br>0.5094            | < 10 <sup>-5</sup><br>6.4267 |
| Pretest (2)<br><i>c739-GAL4&gt; 5HT1A<sup>RNAi</sup></i><br>R: 105.92                   | --                            | < 10 <sup>-5</sup><br>5.0427 | < 10 <sup>-5</sup><br>5.8259 | ~1.0000<br>0.5094            | < 10 <sup>-5</sup><br>6.4267 |
| Test 1/Stressed (3)<br><i>H24-GAL4&gt; 5HT1A<sup>RNAi</sup></i><br>R: 45.565            | --                            | --                           | ~1.0000<br>0.6605            | < 10 <sup>-5</sup><br>5.2652 | ~1.0000<br>1.2487            |
| Test 1/Stressed (4)<br><i>c739-GAL4&gt; 5HT1A<sup>RNAi</sup></i><br>R: 37.660           | --                            | --                           | --                           | < 10 <sup>-5</sup><br>6.0021 | ~1.0000<br>0.6009            |
| Test 2/Stressed (Sucrose)(5)<br><i>H24-GAL4&gt; 5HT1A<sup>RNAi</sup></i><br>R: 112.25   | --                            | --                           | --                           | --                           | < 10 <sup>-5</sup><br>6.5686 |
| Test 2/Stressed (Sucrose) (6)<br><i>c729-GAL4&gt; 5HT1A<sup>RNAi</sup></i><br>R: 30.620 | --                            | --                           | --                           | --                           | --                           |

**Tab. 6d** refers to data presented in Figure 6d.

p-values of the KOLMOGOROV-SMIRNOV-Test (KS); LILLIFORS-Tests (Lillif) and SHAPIRO-WILK-Test (SW).

| <b>Genotype</b>                                                               | <b>N</b> | <b>Std.Dev.</b> | <b>p KS</b> | <b>p Lillif</b> | <b>p SW</b> |
|-------------------------------------------------------------------------------|----------|-----------------|-------------|-----------------|-------------|
| <b>Pretest</b><br><i>H24-GAL4&gt; 5HT1B<sup>RNAi</sup></i>                    | 26       | 1.0266          | < 0.05      | < 0.01          | = 0.0137    |
| <b>Pretest</b><br><i>c739-GAL4&gt; 5HT1B<sup>RNAi</sup></i>                   | 26       | 1.0077          | < 0.15      | < 0.01          | = 0.0026    |
| <b>Test 1</b><br><i>H24-GAL4&gt; 5HT1B<sup>RNAi</sup></i><br><b>Stressed</b>  | 20       | 0.9403          | < 0.10      | < 0.01          | = 0.0148    |
| <b>Test 1</b><br><i>c739-GAL4&gt; 5HT1B<sup>RNAi</sup></i><br><b>Stressed</b> | 21       | 1.3381          | > 0.20      | < 0.05          | = 0.0793    |

Comparison of the unpaired median data by the KRUSKAL-WALLIS-TEST (K-W).

Upper row: multiple p-values; lower row: z-values.

| <b>Genotyp</b>                                                                    | <b>(2)</b>        | <b>(3)</b>        | <b>(4)</b>                   |
|-----------------------------------------------------------------------------------|-------------------|-------------------|------------------------------|
| K-Wallis-Test: H(3 N=93)= 47.2488 p< 10 <sup>-5</sup>                             |                   |                   |                              |
| <b>Pretest (1)</b><br><i>H24-GAL4&gt; 5HT1B<sup>RNAi</sup></i><br>R: 58.404       | ~1.0000<br>0.8580 | ~1.0000<br>0.4075 | < 10 <sup>-5</sup><br>5.7666 |
| <b>Pretest (2)</b><br><i>c739-GAL4&gt; 5HT1B<sup>RNAi</sup></i><br>R: 51.981      | --                | ~1.0000<br>1.2076 | < 10 <sup>-5</sup><br>4.9555 |
| <b>Test/Stressed (3)</b><br><i>H24-GAL4&gt; 5HT1B<sup>RNAi</sup></i><br>R: 61.675 | --                | --                | < 10 <sup>-5</sup><br>5.8030 |
| <b>Test/Stress (4)</b><br><i>c739-GAL4&gt; 5HT1B<sup>RNAi</sup></i><br>R: 12.738  | --                | --                | --                           |



**Supplementary Table 7 | Statistical analysis for Figure 7.**

**Tab. 7a** refers to data presented in Figure 7a.

p-values of the KOLMOGOROV-SMIRNOV-Test (KS); LILLIFORS-Tests (Lillif) and SHAPIRO-WILK-Test (SW).

| Genotype                                  | N  | Std.Dev. | p KS   | p Lillif | p SW               |
|-------------------------------------------|----|----------|--------|----------|--------------------|
| Pretest / <i>5HT-1A-GAL4</i> >UAS-NaChBac | 26 | 0.8038   | < 0.01 | < 0.01   | < 10 <sup>-5</sup> |
| Pretest / UAS-NaChBac/+                   | 21 | 0.8891   | < 0.05 | < 0.01   | = 0.0003           |
| Pretest / + <i>5HT-1A-GAL4</i>            | 20 | 0.9787   | > 0.20 | < 0.05   | = 0.0464           |
| Test / <i>5HT-1A-GAL4</i> >UAS-NaChBac    | 26 | 1.0763   | < 0.15 | < 0.01   | = 0.0009           |
| Test / UAS-NaChBac/+                      | 21 | 1.2611   | > 0.20 | < 0.05   | = 0.1032           |
| Test / + <i>5HT-1A-GAL4</i>               | 19 | 1.1161   | < 0.15 | < 0.01   | = 0.0271           |

Comparison of the unpaired median data by the KRUSKAL-WALLIS-TEST (K-W) of climbing attempts.

Upper row: multiple p-values; lower row: z-values.

| Genotype                                                  | (2)               | (3)               | (4)               | (5)                          | (6)                          |
|-----------------------------------------------------------|-------------------|-------------------|-------------------|------------------------------|------------------------------|
| K-Wallis-Test: H(5 N=133)=72.9694 p< 10 <sup>-5</sup>     |                   |                   |                   |                              |                              |
| Pretest (1)<br><i>5HT-1A-GAL4</i> > UAS-NaChBac R: 78.923 | ~1.0000<br>0.8175 | ~1.0000<br>0.3382 | ~1.0000<br>1.0579 | < 10 <sup>-5</sup><br>4.9017 | ~1.0000<br>4.4686            |
| Pretest (2)<br>UAS-NaChBac /+ R: 88.167                   | --                | ~1.0000<br>0.4457 | ~1.0000<br>0.1826 | < 10 <sup>-5</sup><br>5.4374 | < 10 <sup>-5</sup><br>5.0172 |
| Pretest (3)<br>+ <i>5HT-1A-GAL4</i> R: 82.800             | --                | --                | ~1.0000<br>0.6483 | < 10 <sup>-5</sup><br>4.9249 | 0.0001<br>4.5239             |
| Test (4)<br><i>5HT-1A-GAL4</i> > UAS-NaChBac R: 90.231    | --                | --                | --                | < 10 <sup>-5</sup><br>5.9018 | < 10 <sup>-5</sup><br>5.4408 |
| Test (5)<br>UAS-NaChBac /+ R: 23.50                       | --                | --                | --                | --                           | ~1.0000<br>0.2825            |
| Test (6)<br>+ <i>5HT-1A-GAL4</i> R: 26.947                | --                | --                | --                | --                           | --                           |

**Tab. 7b** refers to data presented in Figure 7b.

p-values of the KOLMOGOROV-SMIRNOV-Test (KS); LILLIFORS-Tests (Lillif) and SHAPIRO-WILK-Test (SW).

| Genotype                                    | N  | Std.Dev. | p KS   | p Lillif | p SW               |
|---------------------------------------------|----|----------|--------|----------|--------------------|
| Pretest<br><i>5HT-1B-GAL4</i> > UAS-NaChBac | 63 | 0.8957   | < 0.01 | < 0.01   | < 10 <sup>-5</sup> |
| Pretest<br>UAS-NaChBac/+                    | 64 | 0.8858   | < 0.01 | < 0.01   | < 10 <sup>-5</sup> |
| Pretest<br>+ <i>5HT-1B-GAL4</i>             | 60 | 0.7702   | < 0.01 | < 0.01   | < 10 <sup>-5</sup> |
| Test 1<br><i>5HT-1B-GAL4</i> > UAS-NaChBac  | 21 | 1.5675   | < 0.20 | < 0.01   | = 0.0924           |
| Test 1<br>UAS-NaChBac/+                     | 23 | 0.7777   | < 0.05 | < 0.01   | = 0.0035           |
| Test 1<br>+ <i>5HT-1B-GAL4</i>              | 20 | 0.9881   | < 0.15 | < 0.01   | = 0.0436           |
| Test 2<br><i>5HT-1B-GAL4</i> > UAS-NaChBac  | 20 | 1.0311   | < 0.15 | < 0.01   | = 0.0056           |
| Test 2<br>UAS-NaChBac/+                     | 21 | 1.1233   | > 0.20 | < 0.01   | = 0.0336           |
| Test 2<br>+ <i>5HT-1B-GAL4</i>              | 19 | 1.0976   | > 0.20 | < 0.10   | = 0.0114           |
| Test 3<br><i>5HT-1B-GAL4</i> > UAS-NaChBac  | 20 | 0.9403   | < 0.05 | < 0.01   | = 0.0022           |
| Test 3<br>UAS-NaChBac/+                     | 20 | 1.0311   | < 0.10 | < 0.01   | = 0.0114           |
| Test 3<br>+ <i>5HT-1B-GAL4</i>              | 19 | 1.6490   | < 0.20 | < 0.01   | = 0.1887           |

| Genotype                                                         | (2)               | (3)               | (4)                          | (5)                          | (6)               | (7)                          | (8)                          | (9)               | (10)                         | (11)                         | (12)                         |
|------------------------------------------------------------------|-------------------|-------------------|------------------------------|------------------------------|-------------------|------------------------------|------------------------------|-------------------|------------------------------|------------------------------|------------------------------|
| K-Wallis-Test: H(11 N=370)=199.0453 p < 10 <sup>-5</sup>         |                   |                   |                              |                              |                   |                              |                              |                   |                              |                              |                              |
| <b>Pretest (1)</b><br><i>5HT-1B-GAL4&gt;NaChBac</i><br>R: 218.95 | ~1.0000<br>2.2699 | ~1.0000<br>0.2500 | 0.0003<br>4.5905             | ~1.0000<br>1.5812            | ~1.0000<br>0.8088 | < 10 <sup>-5</sup><br>6.4990 | ~1.0000<br>0.1793            | ~1.0000<br>1.7290 | < 10 <sup>-5</sup><br>6.3752 | < 10 <sup>-5</sup><br>5.1311 | 0.0001<br>4.9384             |
| <b>Pretest (2)</b><br><i>UAS-NaChBac/+</i><br>R: 262.04          | --                | ~1.0000<br>1.9909 | < 10 <sup>-5</sup><br>6.2014 | ~1.0000<br>0.0726            | ~1.0000<br>2.3829 | < 10 <sup>-5</sup><br>8.0839 | ~1.0000<br>1.4222            | 0.0670<br>3.2741  | < 10 <sup>-5</sup><br>7.9598 | < 10 <sup>-5</sup><br>6.7134 | < 10 <sup>-5</sup><br>6.4893 |
| <b>Pretest (3)</b><br><i>+/5HT-1B-GAL4</i><br>R: 223.78          | --                | --                | 0.0001<br>4.7399             | ~1.0000<br>1.3869            | ~1.0000<br>0.9786 | < 10 <sup>-5</sup><br>6.6349 | ~1.0000<br>0.0004            | ~1.0000<br>1.8903 | < 10 <sup>-5</sup><br>6.5118 | < 10 <sup>-5</sup><br>5.2751 | < 10 <sup>-5</sup><br>5.0813 |
| <b>Test 1 (4)</b><br><i>5HT-1B-GAL4&gt;NaChBac</i><br>R: 95.238  | --                | --                | --                           | < 10 <sup>-5</sup><br>5.1087 | 0.1573<br>3.0378  | ~1.0000<br>1.6365            | 0.0065<br>3.8946             | ~1.0000<br>2.2240 | ~1.0000<br>1.5348            | ~1.0000<br>0.5129            | ~1.0000<br>0.4290            |
| <b>Test 1 (5)</b><br><i>UAS-NaChBac/+</i><br>R: 260.15           | --                | --                | --                           | --                           | ~1.0000<br>1.9389 | < 10 <sup>-5</sup><br>6.7156 | ~1.0000<br>1.1266            | 0.4546<br>2.7022  | < 10 <sup>-5</sup><br>6.6116 | < 10 <sup>-5</sup><br>5.5673 | < 10 <sup>-5</sup><br>5.4118 |
| <b>Test 1 (6)</b><br><i>+/5HT-1B-GAL4</i><br>R: 196.75           | --                | --                | --                           | --                           | --                | 0.0003<br>4.6183             | ~1.0000<br>0.8090            | ~1.0000<br>0.7646 | 0.0004<br>4.5178             | 0.0298<br>3.5081             | 0.0467<br>3.3866             |
| <b>Test 2 (7)</b><br><i>5HT-1B-GAL4&gt;NaChBac</i><br>R: 40.550  | --                | --                | --                           | --                           | --                | --                           | < 10 <sup>-5</sup><br>5.4833 | 0.0098<br>3.7942  | ~1.0000<br>0.1005            | ~1.0000<br>1.1102            | ~1.0000<br>1.1721            |
| <b>Test 2 (8)</b><br><i>UAS-NaChBac/+</i><br>R: 223.79           | --                | --                | --                           | --                           | --                | --                           | --                           | ~1.0000<br>1.5720 | < 10 <sup>-5</sup><br>5.3816 | 0.0009<br>4.3597             | 0.0016<br>4.2250             |
| <b>Test 2 (9)</b><br><i>+/5HT-1B-GAL4</i><br>R: 170.55           | --                | --                | --                           | --                           | --                | --                           | --                           | --                | 0.0145<br>3.6949             | 0.4601<br>2.6982             | 0.6351<br>2.5891             |
| <b>Test 3 (7)</b><br><i>5HT-1B-GAL4&gt;NaChBac</i><br>R: 43.950  | --                | --                | --                           | --                           | --                | --                           | --                           | --                | --                           | ~1.0000<br>1.0097            | ~1.0000<br>1.0729            |
| <b>Test 3 (8)</b><br><i>UAS-NaChBac/+</i><br>R: 78.100           | --                | --                | --                           | --                           | --                | --                           | --                           | --                | --                           | --                           | ~1.0000<br>0.0762            |
| <b>Test 3 (9)</b><br><i>+/5HT-1B-GAL4</i><br>R: 80.711           | --                | --                | --                           | --                           | --                | --                           | --                           | --                | --                           | --                           | --                           |

Tab. 7c refers to data presented in Figure 7c.

p-values of the KOLMOGOROV-SMIRNOV-Test (KS); LILLIFORS-Tests (Lillif) and SHAPIRO-WILK-Test (SW).

|                                                     | N  | Std.Dev. | p KS   | p Lillif | p SW     |
|-----------------------------------------------------|----|----------|--------|----------|----------|
| <b>Pretest<br/>Group 1 (CS)</b>                     | 21 | 0.9258   | < 0.10 | < 0.01   | = 0.0109 |
| <b>Pretest<br/>Group 2 (CS)</b>                     | 21 | 0.9437   | < 0.20 | < 0.01   | = 0.0265 |
| <b>Test 1/Stressed<br/>Group 1 (CS)</b>             | 21 | 1.3274   | > 0.20 | < 0.10   | = 0.2061 |
| <b>Test 1/Stressed<br/>Group 2 (CS)</b>             | 21 | 1.1792   | > 0.20 | < 0.05   | = 0.0581 |
| <b>Test 2/Stressed<br/>Group 1 + SSRI</b>           | 18 | 1.1448   | > 0.20 | < 0.05   | = 0.1330 |
| <b>Test 2/Stressed<br/>Group 2 + H<sub>2</sub>O</b> | 21 | 1.2440   | > 0.20 | < 0.05   | = 0.2987 |

Comparison of the unpaired median data by the KRUSKAL-WALLIS-TEST (K-W).

Upper row: multiple p-values; lower row: z-values.

|                                                                       | (2)               | (3)                          | (4)                          | (5)               | (6)                          |
|-----------------------------------------------------------------------|-------------------|------------------------------|------------------------------|-------------------|------------------------------|
| K-Wallis-Test: H(5 N=123)= 80.0898 p< 10 <sup>-5</sup>                |                   |                              |                              |                   |                              |
| <b>Pretest (1)<br/>Group 1 (CS)<br/>R: 95.095</b>                     | ~1.0000<br>0.3051 | < 10 <sup>-5</sup><br>5.5898 | < 10 <sup>-5</sup><br>5.2717 | ~1.0000<br>1.7815 | < 10 <sup>-5</sup><br>5.4729 |
| <b>Pretest 1 (2)<br/>Group 2 (CS)<br/>R: 98.452</b>                   | --                | < 10 <sup>-5</sup><br>5.8949 | < 10 <sup>-5</sup><br>5.5768 | 0.5703<br>2.0747  | < 10 <sup>-5</sup><br>5.7781 |
| <b>Test 1/Stressed (3)<br/>Group 1 (CS)<br/>R: 33.595</b>             | --                | --                           | ~1.0000<br>0.3181            | 0.0050<br>3.5890  | ~1.0000<br>0.1169            |
| <b>Test 1/Stressed (4)<br/>Group 2 (CS)<br/>R: 37.095</b>             | --                | --                           | --                           | 0.0154<br>3.2834  | ~1.0000<br>0.2013            |
| <b>Test 2/Stressed (5)<br/>Group 1 + Prozac<br/>R: 74.694</b>         | --                | --                           | --                           | --                | 0.0076<br>3.4767             |
| <b>Test 2/Stressed (6)<br/>Group 2 + H<sub>2</sub>O<br/>R: 34.881</b> | --                | --                           | --                           | --                | --                           |

**Tab. 7d** refers to data presented in Figure 7d.

p-values of the KOLMOGOROV-SMIRNOV-Test (KS); LILLIFORS-Tests (Lillif) and SHAPIRO-WILK-Test (SW).

| Genotype                                       | N  | Std.Dev. | p KS   | p Lillif | p SW     |
|------------------------------------------------|----|----------|--------|----------|----------|
| Pretest<br><i>H24-GAL4&gt;UAS-TNT</i>          | 25 | 0.7024   | < 0.10 | < 0.01   | = 0.0003 |
| Test 1<br><i>H24-GAL4&gt;UAS-TNT+8-OH-DPAT</i> | 24 | 1.0206   | > 0.20 | < 0.05   | = 0.0095 |
| Pretest<br>UAS-TNT/II                          | 25 | 1.2069   | < 0.10 | < 0.01   | = 0.0280 |
| Test 1<br>UAS-TNT/II+8-OH-DPAT                 | 25 | 1.1662   | < 0.20 | < 0.01   | = 0.0194 |
| Pretest<br><i>H24-GAL4/II</i>                  | 25 | 0.9183   | < 0.15 | < 0.01   | = 0.0077 |
| Test 1<br><i>H24-GAL4/II+8-OH-DPAT</i>         | 24 | 1.1034   | > 0.20 | < 0.10   | = 0.0346 |

Comparison of the unpaired median data by the KRUSKAL-WALLIS-TEST (K-W).

Upper row: multiple p-values; lower row: z-values.

| Genotyp                                                     | (2)               | (3)               | (4)                          | (5)                          | (6)                          |
|-------------------------------------------------------------|-------------------|-------------------|------------------------------|------------------------------|------------------------------|
| K-Wallis-Test: H(5 N=148)= 80.5844 p< 10 <sup>-5</sup>      |                   |                   |                              |                              |                              |
| Pretest (1)<br><i>H24-GAL4&gt;UAS-TNT</i><br>R: 110.84      | ~1.0000<br>1.3066 | 0.0908<br>2.7448  | < 10 <sup>-5</sup><br>6.9048 | ~1.0000<br>1.1464            | < 10 <sup>-5</sup><br>5.8557 |
| Test 1<br><i>H24-GAL4&gt;UAS-TNT+8-OH-DPAT</i><br>R: 94.833 | --                | ~1.0000<br>1.4100 | < 10 <sup>-5</sup><br>5.5274 | ~1.0000<br>0.1720            | 0.0001<br>4.5034             |
| Pretest<br>UAS-TNT/II<br>R: 77.560                          | --                | --                | 0.0005<br>4.1600             | ~1.0000<br>1.5984            | 0.0254<br>3.1391             |
| Test 1<br>UAS-TNT/II+8-OH-DPAT<br>R: 27.120                 | --                | --                | --                           | < 10 <sup>-5</sup><br>5.7584 | ~1.0000<br>0.9783            |
| Pretest<br><i>H24-GAL4/II</i><br>R: 96.940                  | --                | --                | --                           | --                           | < 10 <sup>-5</sup><br>4.7211 |
| Test 1<br><i>H24-GAL4/II+8-OH-DPAT</i><br>R: 39.104         | --                | --                | --                           | --                           | --                           |

**Supplementary Table 8 | Statistical analysis for Figure S1.**

**Tab. 8a** refers to data presented in Figure S1a.

p-values of the **KOLMOGOROV-SMIRNOV-Test (KS)**; **LILLIFORS-Tests (Lillif)** and **SHAPIRO-WILK-Test (SW)**.

|                             | <b>N</b> | <b>Std.Dev.</b> | <b>p KS</b> | <b>p Lillif</b> | <b>p SW</b> |
|-----------------------------|----------|-----------------|-------------|-----------------|-------------|
| <b>CS no object</b>         | 29       | 0.9285          | < 0.10      | < 0.01          | = 0.0130    |
| <b>CS vis. obj.</b>         | 28       | 0.7935          | < 0.05      | < 0.01          | = 0.0014    |
| <b>CS odour</b>             | 28       | 0.9201          | < 0.05      | < 0.01          | = 0.0036    |
| <b>CS vis. obj. + odour</b> | 28       | 0.8698          | < 0.10      | < 0.01          | = 0.0028    |

Comparison of the unpaired median data by the **KRUSKAL-WALLIS-TEST (K-W)** of climbing attempts.  
Upper row: multiple p-values; lower row: z-values.

|                                                    | <b>(2)</b>            | <b>(3)</b>            | <b>(4)</b>            |
|----------------------------------------------------|-----------------------|-----------------------|-----------------------|
| K-Wallis-Test: $H(3, N=113)=73,7944$ $p < 10^{-5}$ |                       |                       |                       |
| <b>CS no obj. (1)</b><br>R: 111.93                 | < $10^{-5}$<br>5.2158 | < $10^{-5}$<br>4.9710 | < $10^{-5}$<br>8.2809 |
| <b>CS vis. obj. (2)</b><br>R: 118.20               | --                    | ~1,0000<br>0.2427     | 0.0143<br>3.0385      |
| <b>CS odour (3)</b><br>R: 102.28                   | --                    | --                    | 0.0062<br>3.2812      |
| <b>CS vis. obj. + odour (4)</b><br>R: 104.70       | --                    | --                    | --                    |

**Tab. 8b** refers to data presented in Figure S1b.

p-values of the KOLMOGOROV-SMIRNOV-Test (KS); LILLIFORS-Tests (Lillif) and SHAPIRO-WILK-Test (SW).

| <b>Genotype</b>                                               | <b>N</b> | <b>Std.Dev.</b> | <b>p KS</b> | <b>p Lillif</b> | <b>p SW</b> |
|---------------------------------------------------------------|----------|-----------------|-------------|-----------------|-------------|
| <b>CS 1<sup>st</sup> run no stimulus (Group I)</b>            | 24       | 1.5598          | > 0.20      | < 0.15          | = 0.0941    |
| <b>CS 1<sup>st</sup> run no stimulus (Group II)</b>           | 23       | 1.5616          | > 0.20      | < 0.10          | = 0.2649    |
| <b>CS 2<sup>nd</sup> run (24h later) odour</b>                | 24       | 1.0734          | < 0.10      | < 0.01          | = 0.0061    |
| <b>CS 2<sup>nd</sup> run (24h later) no odour</b>             | 23       | 1.4904          | < 0.10      | < 0.01          | = 0.0043    |
| <b>H24&gt;TNT 1<sup>st</sup> run no stimulus (Group I)</b>    | 27       | 1.5021          | > 0.20      | < 0.10          | = 0.1796    |
| <b>H24&gt;TNT 1<sup>st</sup> run no stimulus (Group II)</b>   | 22       | 1.7563          | > 0.20      | < 0.01          | = 0.1867    |
| <b>H24&gt;TNT 2<sup>nd</sup> run (24h later) odour</b>        | 27       | 1.6486          | > 0.20      | < 0.05          | = 0.0876    |
| <b>H24&gt;TNT 2<sup>nd</sup> run (24h later) no odour</b>     | 22       | 1.3266          | < 0.20      | < 0.01          | = 0.0261    |
| <b>c305a&gt;TNT 1<sup>st</sup> run no stimulus (Group I)</b>  | 23       | 1.1995          | > 0.20      | < 0.01          | = 0.0208    |
| <b>c305a&gt;TNT 1<sup>st</sup> run no stimulus (Group II)</b> | 24       | 1.2959          | > 0.20      | < 0.01          | = 0.0163    |
| <b>c305a&gt;TNT 2<sup>nd</sup> run (24h later) odour</b>      | 23       | 1.3817          | > 0.20      | < 0.15          | = 0.0335    |
| <b>c305a&gt;TNT 2<sup>nd</sup> run (24h later) no odour</b>   | 24       | 1.2504          | > 0.20      | < 0.05          | = 0.0827    |
| <b>mb247&gt;TNT 1<sup>st</sup> run no stimulus (Group I)</b>  | 21       | 1.8860          | > 0.20      | < 0.05          | = 0.0588    |
| <b>mb247&gt;TNT 1<sup>st</sup> run no stimulus (Group II)</b> | 20       | 1.4681          | > 0.20      | > 0.20          | = 0.1738    |
| <b>mb247&gt;TNT 2<sup>nd</sup> run (24h later) odour</b>      | 21       | 1.8297          | > 0.20      | < 0.15          | = 0.1487    |
| <b>mb247&gt;TNT 2<sup>nd</sup> run (24h later) no odour</b>   | 20       | 1.5044          | > 0.20      | < 0.05          | = 0.1704    |
| <b>c739&gt;TNT 1<sup>st</sup> run no stimulus (Group I)</b>   | 21       | 1.3990          | > 0.20      | < 0.05          | = 0.1623    |
| <b>c739&gt;TNT 1<sup>st</sup> run no stimulus (Group II)</b>  | 21       | 1.1019          | < 0.20      | < 0.01          | = 0.0248    |
| <b>c739&gt;TNT 2<sup>nd</sup> run (24h later) odour</b>       | 21       | 1.8746          | > 0.20      | < 0.10          | = 0.1290    |
| <b>c739&gt;TNT 2<sup>nd</sup> run (24h later) no odour</b>    | 21       | 1.8949          | > 0.20      | < 0.10          | = 0.1100    |

Comparison of the paired data of the climbing behaviour of *Drosophila* males by the WILCOXON-MATCHED-PAIRS Test of their first run without odour and their second run paired with odour.

| Genotype                                                                                                     | N  | T     | Z      | p      |
|--------------------------------------------------------------------------------------------------------------|----|-------|--------|--------|
| CS 2 <sup>nd</sup> run (24 h) + odour<br>vs.<br>CS 1 <sup>st</sup> run - no stimulus (Group I)               | 24 | 11.50 | 3.4906 | 0.0005 |
| H24>TNT 2 <sup>nd</sup> run (24 h) + odour<br>vs.<br>H24>TNT 1 <sup>st</sup> run - no stimulus (Group I)     | 27 | 32.00 | 3.0680 | 0.0022 |
| c305a>TNT 2 <sup>nd</sup> run (24 h) + odour<br>vs.<br>c305a>TNT 1 <sup>st</sup> run - no stimulus (Group I) | 23 | 12.00 | 3.5974 | 0.0003 |
| mb247>TNT 2 <sup>nd</sup> run (24 h) + odour<br>vs.<br>mb247>TNT 1 <sup>st</sup> run - no stimulus (Group I) | 21 | 56.00 | 0.2272 | 0.8203 |
| c739>TNT 2 <sup>nd</sup> run (24 h) + odour<br>vs.<br>c739>TNT 1 <sup>st</sup> run - no stimulus (Group I)   | 21 | 60.50 | 0.3878 | 0.6982 |

Comparison of the paired data of the climbing behaviour of *Drosophila* males by the WILCOXON-MATCHED-PAIRS Test of their first run without odour and their second run without odour.

| Genotype                                                                                                       | N  | T     | Z      | p      |
|----------------------------------------------------------------------------------------------------------------|----|-------|--------|--------|
| CS 1 <sup>st</sup> run - no stimulus (Group II)<br>vs.<br>CS 2 <sup>nd</sup> run (24 h) no odour               | 23 | 21.00 | 2.6273 | 0.0086 |
| H24>TNT 1 <sup>st</sup> run - no stimulus (Group II)<br>vs.<br>H24>TNT 2 <sup>nd</sup> run (24 h) no odour     | 22 | 84.00 | 0.7840 | 0.4330 |
| c305a>TNT 1 <sup>st</sup> run - no stimulus (Group II)<br>vs.<br>c305a>TNT 2 <sup>nd</sup> run (24 h) no odour | 24 | 88.00 | 0.2817 | 0.7782 |
| mb247>TNT 1 <sup>st</sup> run - no stimulus (Group II)<br>vs.<br>mb247>TNT 2 <sup>nd</sup> run (24 h) no odour | 20 | 48.00 | 1.3491 | 0.1773 |
| c739>TNT 1 <sup>st</sup> run - no stimulus (Group II)<br>vs.<br>c739>TNT 2 <sup>nd</sup> run (24 h) no odour   | 21 | 35.50 | 1.3915 | 0.1641 |

Comparison of the unpaired data of the climbing behaviour of *Drosophila* males by the MANN-WHITNEY-U-Test (Mann U) of their second run with a food-odour and their second run without an odour.

| Group                                                                                                  | U      | Z       | 2*1 sided exact p |
|--------------------------------------------------------------------------------------------------------|--------|---------|-------------------|
| CS 2 <sup>nd</sup> run (24 h) + odour<br>vs.<br>CS 2 <sup>nd</sup> run (24 h) +no odour                | 142.50 | 2.8411  | 0.0038            |
| H24>TNT 2 <sup>nd</sup> run (24 h) + odour<br>vs.<br>H24>TNT 2 <sup>nd</sup> run (24 h) +no odour      | 232.50 | 1.2965  | 0.1967            |
| c305a>TNT 2 <sup>nd</sup> run (24 h) + odour<br>vs.<br>c305a>TNT 2 <sup>nd</sup> run (24 h) + no odour | 187.50 | 1.8834  | 0.0592            |
| mb247>TNT 2 <sup>nd</sup> run (24 h) + odour<br>vs.<br>mb247>TNT 2 <sup>nd</sup> run (24 h) + no odour | 207.50 | -0.0652 | 0.9486            |
| c739>TNT 2 <sup>nd</sup> run (24 h) + odour<br>vs.<br>c739>TNT 2 <sup>nd</sup> run (24 h) + no odour   | 193.00 | 0.6918  | 0.5010            |

**Tab. 8c** refers to data presented in Figure 11c.

p-values of the KOLMOGOROV-SMIRNOV-Test (KS); LILLIFORS-Tests (Lillif) and SHAPIRO-WILK-Test (SW).

| Genotype                                              | N  | Std.Dev. | p KS   | p Lillif | p SW     |
|-------------------------------------------------------|----|----------|--------|----------|----------|
| CS 1 <sup>st</sup> run no stimulus (Group I)          | 25 | 0.9363   | < 0.10 | < 0.01   | = 0.0051 |
| CS 1 <sup>st</sup> run no stimulus (Group II)         | 25 | 1.2356   | < 0.20 | < 0.01   | = 0.0252 |
| CS 2 <sup>nd</sup> run (24h later) vis. obj.          | 25 | 1.1136   | > 0.20 | < 0.05   | = 0.0032 |
| CS 2 <sup>nd</sup> run (24h later) no obj.            | 25 | 1.3229   | < 0.15 | < 0.01   | = 0.0670 |
| H24>TNT 1 <sup>st</sup> run no stimulus (Group I)     | 17 | 0.9034   | < 0.10 | < 0.01   | = 0.0106 |
| H24>TNT 1 <sup>st</sup> run no stimulus (Group II)    | 18 | 0.9003   | < 0.05 | < 0.01   | = 0.0028 |
| H24>TNT 2 <sup>nd</sup> run (24h later) vis. obj.     | 17 | 1.0146   | > 0.20 | < 0.05   | = 0.0252 |
| H24>TNT 2 <sup>nd</sup> run (24h later) no obj.       | 18 | 0.8264   | > 0.20 | < 0.01   | = 0.0234 |
| NP1131>TNT 1 <sup>st</sup> run no stimulus (Group I)  | 23 | 0.9679   | > 0.20 | < 0.01   | = 0.0311 |
| NP1131>TNT 1 <sup>st</sup> run no stimulus (Group II) | 23 | 0.9960   | < 0.20 | < 0.01   | = 0.0278 |
| NP1131>TNT 2 <sup>nd</sup> run (24h later) vis. obj.  | 23 | 1.2175   | > 0.20 | < 0.05   | = 0.0524 |
| NP1131>TNT 2 <sup>nd</sup> run (24h later) no obj.    | 23 | 1.3644   | > 0.20 | < 0.15   | = 0.3714 |
| mb247>TNT 1 <sup>st</sup> run no stimulus (Group I)   | 15 | 0.8619   | > 0.20 | < 0.01   | = 0.0502 |
| mb247>TNT 1 <sup>st</sup> run no stimulus (Group II)  | 15 | 1.1255   | < 0.20 | < 0.01   | = 0.0568 |
| mb247>TNT 2 <sup>nd</sup> run (24h later) vis. obj.   | 15 | 1.0556   | < 0.10 | < 0.01   | = 0.0149 |
| mb247>TNT 2 <sup>nd</sup> run (24h later) no obj.     | 15 | 0.8619   | < 0.20 | < 0.01   | = 0.0028 |
| c739>TNT 1 <sup>st</sup> run no stimulus (Group I)    | 20 | 1.5183   | > 0.20 | < 0.05   | = 0.1106 |
| c739>TNT 1 <sup>st</sup> run no stimulus (Group II)   | 20 | 1.1821   | < 0.20 | < 0.01   | = 0.0429 |
| c739>TNT 2 <sup>nd</sup> run (24h later) vis. obj.    | 20 | 1.5009   | > 0.20 | < 0.10   | = 0.1099 |
| c739>TNT 2 <sup>nd</sup> run (24h later) no obj.      | 20 | 1.6376   | > 0.20 | > 0.20   | = 0.5225 |

Comparison of the paired data of the climbing behaviour of *Drosophila* males by the WILCOXON-MATCHED-PAIRS Test of their first run without visual object and their second run with a visual object.

| Genotype                                                                                                          | N  | T     | Z      | p                 |
|-------------------------------------------------------------------------------------------------------------------|----|-------|--------|-------------------|
| CS 2 <sup>nd</sup> run (24 h) + vis.obj.<br>vs.<br>CS 1 <sup>st</sup> run - no stimulus (Group I)                 | 25 | 0.00  | 4.1069 | <10 <sup>-5</sup> |
| H24>TNT 2 <sup>nd</sup> run (24 h) + vis.obj.<br>vs.<br>H24>TNT 1 <sup>st</sup> run - no stimulus (Group I)       | 17 | 0.00  | 3.4078 | 0.0007            |
| NP1131>TNT 2 <sup>nd</sup> run (24 h) + vis.obj.<br>vs.<br>NP1131>TNT 1 <sup>st</sup> run - no stimulus (Group I) | 23 | 23.00 | 3.2151 | 0.0013            |
| mb247>TNT 2 <sup>nd</sup> run (24 h) + vis.obj.<br>vs.<br>mb247>TNT 1 <sup>st</sup> run - no stimulus (Group I)   | 15 | 13.00 | 1.1255 | 0.2604            |
| c739>TNT 2 <sup>nd</sup> run (24 h) + vis.obj.<br>vs.<br>c739>TNT 1 <sup>st</sup> run - no stimulus (Group I)     | 20 | 42.50 | 1.3186 | 0.1873            |



Comparison of the paired data of the climbing behaviour of *Drosophila* males by the WILCOXON-MATCHED-PAIRS Test of their first run without visual object and their second run also without visual object.

| Genotype                                                                                                          | N  | T     | Z      | p      |
|-------------------------------------------------------------------------------------------------------------------|----|-------|--------|--------|
| CS 1 <sup>st</sup> run - no stimulus (Group II)<br>vs.<br>CS 2 <sup>nd</sup> run (24 h) no vis.obj.               | 25 | 73.50 | 0.5226 | 0.6013 |
| H24>TNT 1 <sup>st</sup> run - no stimulus (Group II)<br>vs.<br>H24>TNT 2 <sup>nd</sup> run (24 h) no vis.obj.     | 18 | 33.00 | 0.4707 | 0.6379 |
| c305a>TNT 1 <sup>st</sup> run - no stimulus (Group II)<br>vs.<br>c305a>TNT 2 <sup>nd</sup> run (24 h) no vis.obj. | 23 | 51.00 | 0.0942 | 0.9250 |
| mb247>TNT 1 <sup>st</sup> run - no stimulus (Group II)<br>vs.<br>mb247>TNT 2 <sup>nd</sup> run (24 h) no vis.obj. | 15 | 39.00 | 0.8475 | 0.3967 |
| c739>TNT 1 <sup>st</sup> run - no stimulus (Group II)<br>vs.<br>c739>TNT 2 <sup>nd</sup> run (24 h) no vis.obj.   | 20 | 49.50 | 0.9566 | 0.3388 |

Comparison of the unpaired data of the climbing behaviour of *Drosophila* males by the MANN-WHITNEY-U-Test (Mann U) of their second run with a visual object and their second run without a visual object.

| Group                                                                                                    | U      | Z       | 2*1 sided exact p |
|----------------------------------------------------------------------------------------------------------|--------|---------|-------------------|
| CS 2 <sup>nd</sup> run (24 h) + vis.obj.<br>vs.<br>CS 2 <sup>nd</sup> run (24 h) +no obj.                | 111.50 | 3.9000  | <10 <sup>-5</sup> |
| H24>TNT 2 <sup>nd</sup> run (24 h) + vis.obj.<br>vs.<br>H24>TNT 2 <sup>nd</sup> run (24 h) +no obj.      | 41.00  | 3.6966  | 0.0001            |
| c305a>TNT 2 <sup>nd</sup> run (24 h) + vis.obj.<br>vs.<br>c305a>TNT 2 <sup>nd</sup> run (24 h) + no obj. | 141.00 | 2.7132  | 0.0061            |
| mb247>TNT 2 <sup>nd</sup> run (24 h) + vis.obj.<br>vs.<br>mb247>TNT 2 <sup>nd</sup> run (24 h) + no obj. | 94.00  | 0.7673  | 0.4610            |
| c739>TNT 2 <sup>nd</sup> run (24 h) + vis.obj.<br>vs.<br>c739>TNT 2 <sup>nd</sup> run (24 h) + no obj.   | 171.50 | -0.7709 | 0.4450            |

## Supplementary Table 9 | Statistical analysis for Figure S2.

**Tab. 9a** refers to data presented in Figure S2a.

p-values of the KOLMOGOROV-SMIRNOV-Test (KS); LILLIFORS-Tests (Lillif) and SHAPIRO-WILK-Test (SW).

|                                          | N  | Std.Dev. | p KS   | p Lillif | p SW               |
|------------------------------------------|----|----------|--------|----------|--------------------|
| <b>Pretest CS</b>                        | 40 | 0.7910   | < 0.01 | < 0.01   | < 10 <sup>-5</sup> |
| <b>Test CS Group Stress with sucrose</b> | 20 | 0.9515   | > 0.20 | < 0.05   | = 0.0459           |
| <b>Test CS Group Stress no sucrose</b>   | 20 | 1.1910   | > 0.20 | < 0.05   | = 0.0387           |

Comparison of the unpaired median data by the KRUSKAL-WALLIS-TEST (K-W) of climbing attempts.

Upper row: multiple p-values; lower row: z-values.

|                                                               | (2)               | (3)                          |
|---------------------------------------------------------------|-------------------|------------------------------|
| K-Wallis-Test: H(2, N=80)=41.2017 p< 10 <sup>-5</sup>         |                   |                              |
| <b>Pretest (1) CS</b><br>R: 49.913                            | ~1.0000<br>0.0452 | < 10 <sup>-5</sup><br>5.8710 |
| <b>Pretest (2) CS/ group stress with sucrose</b><br>R: 49.625 | --                | < 10 <sup>-5</sup><br>5.0453 |
| <b>Pretest (3) CS/ group stress no sucrose</b><br>R: 12.550   | --                | --                           |

**Tab. 9b** refers to data presented in Figure S2b.

p-values of the KOLMOGOROV-SMIRNOV-Test (KS); LILLIFORS-Tests (Lillif) and SHAPIRO-WILK-Test (SW).

|                                                   | N  | Std.Dev. | p KS   | p Lillif | p SW     |
|---------------------------------------------------|----|----------|--------|----------|----------|
| <b>Pretest Group 1 (CS)</b>                       | 24 | 0.8165   | < 0.10 | < 0.01   | = 0.0006 |
| <b>Pretest Group 2 (CS)</b>                       | 24 | 0.8297   | < 0.01 | < 0.01   | = 0.0004 |
| <b>Pretest Group 3 (CS)</b>                       | 24 | 0.8502   | < 0.15 | < 0.01   | = 0.0011 |
| <b>Test 1 Group 1 (CS &gt; stressed)</b>          | 23 | 1.1123   | > 0.20 | < 0.05   | = 0.0040 |
| <b>Test 1 Group 2 (CS &gt; stressed)</b>          | 24 | 1.0135   | > 0.20 | < 0.05   | = 0.0385 |
| <b>Test 1 Group 3 (CS &gt; stressed)</b>          | 24 | 1.1516   | > 0.20 | < 0.05   | = 0.0479 |
| <b>Test 2 (stressed) Group 1 + Sucrose</b>        | 23 | 1.1524   | < 0.15 | < 0.01   | = 0.0163 |
| <b>Test 2 (stressed) Group 2 + H<sub>2</sub>O</b> | 24 | 1.0632   | < 0.15 | < 0.01   | = 0.0163 |
| <b>Test 2 (stressed) Group 3 + Arabinose</b>      | 24 | 1.2730   | > 0.20 | < 0.05   | = 0.1280 |

Comparison of the unpaired median data by the KRUSKAL-WALLIS-TEST (K-W).

Upper row: multiple p-values; lower row: z-values.

|                                                                          | (2)               | (3)               | (4)                          | (5)                          | (6)                          | (7)                          | (8)                          | (9)                          |
|--------------------------------------------------------------------------|-------------------|-------------------|------------------------------|------------------------------|------------------------------|------------------------------|------------------------------|------------------------------|
| K-Wallis-Test: H(8 N= 213)= 150.0822 p< 10 <sup>-5</sup>                 |                   |                   |                              |                              |                              |                              |                              |                              |
| <b>Pretest (1)</b><br><b>Group 1 (CS)</b><br>R: 154.00                   | ~1.0000<br>0.5258 | ~1.0000<br>0.0796 | < 10 <sup>-5</sup><br>5.7285 | < 10 <sup>-5</sup><br>5.8349 | < 10 <sup>-5</sup><br>5.6335 | ~1.0000<br>0.2575            | < 10 <sup>-5</sup><br>6.0024 | ~1.0000<br>0.8063            |
| <b>Pretest (2)</b><br><b>Group 2 (CS)</b><br>R: 163.35                   | --                | ~1.0000<br>0.4461 | < 10 <sup>-5</sup><br>6.2487 | < 10 <sup>-5</sup><br>6.3607 | < 10 <sup>-5</sup><br>6.1593 | ~1.0000<br>0.7776            | < 10 <sup>-5</sup><br>6.5281 | ~1.0000<br>1.3264            |
| <b>Pretest (3)</b><br><b>Group 3 (CS)</b><br>R: 155.42                   | --                | --                | < 10 <sup>-5</sup><br>5.8073 | < 10 <sup>-5</sup><br>5.9145 | < 10 <sup>-5</sup><br>5.7131 | ~1.0000<br>0.3363            | < 10 <sup>-5</sup><br>6.0820 | ~1.0000<br>0.8850            |
| <b>Test 1/Stress (4)</b><br><b>Group 1 (CS)</b><br>R: 50.978             | --                | --                | --                           | ~1.0000<br>0.0440            | ~1.0000<br>0.1553            | < 10 <sup>-5</sup><br>5.4138 | ~1.0000<br>0.2096            | < 10 <sup>-5</sup><br>4.8707 |
| <b>Test 1/Stress (5)</b><br><b>Group 2 (CS)</b><br>R: 50.188             | --                | --                | --                           | --                           | ~1.0000<br>0.2014            | < 10 <sup>-5</sup><br>5.5150 | ~1.0000<br>0.1674            | < 10 <sup>-5</sup><br>4.9662 |
| <b>Test 1/Stress (6)</b><br><b>Group 3 (CS)</b><br>R: 53.771             | --                | --                | --                           | --                           | --                           | < 10 <sup>-5</sup><br>5.3158 | ~1.0000<br>0.3689            | 0.0001<br>4.7670             |
| <b>Test 2/Stress (7)</b><br><b>Group 1 + Sucrose</b><br>R: 149.37        | --                | --                | --                           | --                           | --                           | --                           | < 10 <sup>-5</sup><br>5.6807 | ~1.0000<br>0.5431            |
| <b>Test 2/Stress (8)</b><br><b>Group 2 + H<sub>2</sub>O</b><br>R: 47.208 | --                | --                | --                           | --                           | --                           | --                           | --                           | < 10 <sup>-5</sup><br>5.1319 |
| <b>Test 2/Stress (9)</b><br><b>Group 2 + Arabinose</b><br>R: 139.50      | --                | --                | --                           | --                           | --                           | --                           | --                           | --                           |

**Tab. 9c** refers to data presented in Figure S2c.

p-values of the KOLMOGOROV-SMIRNOV-Test (KS); LILLIFORS-Tests (Lillif) and SHAPIRO-WILK-Test (SW).

|                             | N  | Std.Dev. | p KS   | p Lillif | p SW     |
|-----------------------------|----|----------|--------|----------|----------|
| <b>Group Sucrose</b>        | 8  | 0.4711   | > 0.20 | < 0.15   | = 0.0245 |
| <b>Group H<sub>2</sub>O</b> | 8  | 0.4244   | > 0.20 | > 0.20   | = 0.9998 |
| <b>Group Sucrose + αMTP</b> | 11 | 0.2603   | > 0.20 | > 0.20   | = 0.5193 |

Comparison of the normally distributed data of the 5HT-quantification in the ellipsoid body by the unpaired T-TEST of *Drosophila* males of the stressed and control group.

| Group                                                             | t       | F      | p      |
|-------------------------------------------------------------------|---------|--------|--------|
| <b>Group Sucrose</b><br>vs.<br><b>Group H<sub>2</sub>O</b>        | -2.2659 | 1.2318 | 0.0398 |
| <b>Group Sucrose</b><br>vs.<br><b>Group Sucrose + αMTP</b>        | 2.6996  | 3.2753 | 0.0152 |
| <b>Group H<sub>2</sub>O</b><br>vs.<br><b>Group Sucrose + αMTP</b> | -0.3413 | 2.6589 | 0.7371 |

**Tab. 9d** refers to data presented in Figure S2d.

p-values of the KOLMOGOROV-SMIRNOV-Test (KS); LILLIFORS-Tests (Lillif) and SHAPIRO-WILK-Test (SW).

|                                         | <b>N</b> | <b>Std.Dev.</b> | <b>p KS</b> | <b>p Lillif</b> | <b>p SW</b> |
|-----------------------------------------|----------|-----------------|-------------|-----------------|-------------|
| <b>H<sub>2</sub>O</b>                   | 8        | 0.4815          | > 0.20      | > 0.20          | = 0.4393    |
| <b>Sucrose</b>                          | 8        | 1.4230          | > 0.20      | < 0.05          | = 0.0230    |
| <b>Sucrose + <math>\alpha</math>MTP</b> | 11       | 0.3387          | > 0.20      | < 0.15          | = 0.2052    |

Comparison of the unpaired median data by the KRUSKAL-WALLIS-TEST (K-W).

Upper row: multiple p-values; lower row: z-values.

| <b>Genotype</b>                                         | <b>(2)</b>       | <b>(3)</b>       |
|---------------------------------------------------------|------------------|------------------|
| K-Wallis-Test: H(2 N=27)= 10.5251 p< 0.0052             |                  |                  |
| <b>H<sub>2</sub>O (1)</b><br>R: 13.125                  | 0.1219<br>2.0473 | 0.9234<br>0.0199 |
| <b>Sucrose (2)</b><br>R: 21.250                         | --               | 0.0038<br>3.2229 |
| <b>Sucrose + <math>\alpha</math>MTP (3)</b><br>R: 9.364 | --               | --               |

**Tab. 9e** refers to data presented in Figure S2e.

p-values of the KOLMOGOROV-SMIRNOV-Test (KS); LILLIFORS-Tests (Lillif) and SHAPIRO-WILK-Test (SW).

|                                                                  | <b>N</b> | <b>Std.Dev.</b> | <b>p KS</b> | <b>p Lillif</b> | <b>p SW</b> |
|------------------------------------------------------------------|----------|-----------------|-------------|-----------------|-------------|
| <b>GFP intensity in <math>\alpha</math>-lobes Control</b>        | 12       | 996194.8        | > 0.20      | > 0.20          | = 0.3615    |
| <b>GFP intensity in <math>\alpha</math> lobes Stressed group</b> | 12       | 750375.7        | > 0.20      | < 0.10          | = 0.1278    |
| <b>GFP Intensity in <math>\beta</math>-lobes Control</b>         | 12       | 957297.6        | > 0.20      | > 0.20          | = 0.5101    |
| <b>GFP Intensity in <math>\beta</math>-lobes Stressed group</b>  | 13       | 702174.6        | > 0.20      | < 0.20          | = 0.5537    |
| <b>GFP Intensity in the EB Control</b>                           | 12       | 896035.9        | > 0.20      | > 0.20          | = 0.4320    |
| <b>GFP Intensity in the EB Stressed group</b>                    | 13       | 960263.4        | > 0.20      | > 0.20          | = 0.2081    |

Comparison of the normally distributed data by the unpaired T-TEST (K-W) of the GFP Intensity in different brain compartments of the stressed flies and the control group.

| <b>Group</b>                                             | <b>T</b> | <b>F</b> | <b>p</b> |
|----------------------------------------------------------|----------|----------|----------|
| <b>Stress vs. Control (in <math>\alpha</math>-lobes)</b> | -0.4479  | 1.7625   | 0.6586   |
| <b>Stress vs. Control (in <math>\beta</math>-lobes)</b>  | -1.6970  | 1.8587   | 0.1032   |
| <b>Stress vs. Control (in the EB)</b>                    | -1.9030  | 1.1485   | 0.0696   |

## Supplementary Table 10 | Statistical analysis for Figure S4.

Tab. 10a refers to data presented in Figure S4a.

p-values of the KOLMOGOROV-SMIRNOV-Test (KS); LILLIFORS-Tests (Lillif) and SHAPIRO-WILK-Test (SW).

|                                                                                                             | N  | Std.Dev. | p KS   | p Lillif | p SW     |
|-------------------------------------------------------------------------------------------------------------|----|----------|--------|----------|----------|
| Pretest<br><i>mb247&gt;&gt;GAL80<sup>ts</sup>&gt;5HT1A<sup>RNAi</sup></i>                                   | 21 | 1.2209   | > 0.20 | < 0.01   | = 0.0683 |
| Pretest<br><i>mb247&gt;&gt;GAL80<sup>ts</sup>&gt;5HT1A<sup>RNAi</sup></i>                                   | 21 | 0.9284   | < 0.20 | < 0.01   | = 0.0214 |
| Test 1<br><i>mb247&gt;&gt;GAL80<sup>ts</sup>&gt;5HT1A<sup>RNAi</sup></i><br>Stressed Group (18°C)           | 21 | 1.0556   | < 0.15 | < 0.01   | = 0.0594 |
| Test 1<br><i>mb247&gt;&gt;GAL80<sup>ts</sup>&gt;5HT1A<sup>RNAi</sup></i><br>Stressed Group (29°C)           | 21 | 1.1609   | < 0.10 | < 0.01   | = 0.0216 |
| Test 2 (sucrose)<br><i>mb247&gt;&gt;GAL80<sup>ts</sup>&gt;5HT1A<sup>RNAi</sup></i><br>Stressed Group (18°)  | 20 | 1.2763   | > 0.20 | < 0.15   | = 0.3753 |
| Test 2 (sucrose)<br><i>mb247&gt;&gt;GAL80<sup>ts</sup>&gt;5HT1A<sup>RNAi</sup></i><br>Stressed Group (29°C) | 21 | 1.1106   | > 0.20 | < 0.05   | = 0.1070 |

Comparison of the unpaired median data by the KRUSKAL-WALLIS-TEST (K-W).

Upper row: multiple p-values; lower row: z-values.

| Genotyp                                                                                                 | (2)               | (3)                          | (4)                          | (5)                          | (6)                          |
|---------------------------------------------------------------------------------------------------------|-------------------|------------------------------|------------------------------|------------------------------|------------------------------|
| K-Wallis-Test: H(5 N=125)= 85.9224 p< 10 <sup>-5</sup>                                                  |                   |                              |                              |                              |                              |
| Pretest/Stress (1)<br><i>mb247&gt;&gt;GAL80<sup>ts</sup>&gt;5HT1A<sup>RNAi</sup></i><br>R: 95.143       | ~1.0000<br>0.3237 | < 10 <sup>-5</sup><br>5.1366 | < 10 <sup>-5</sup><br>5.6562 | ~1.0000<br>0.2997            | < 10 <sup>-5</sup><br>5.7073 |
| Pretest/Stress (2)<br><i>mb247&gt;&gt;GAL80<sup>ts</sup>&gt;5HT1A<sup>RNAi</sup></i><br>R: 91.524       | --                | < 10 <sup>-5</sup><br>4.8129 | < 10 <sup>-5</sup><br>5.3325 | ~1.0000<br>0.0110            | < 10 <sup>-5</sup><br>5.3836 |
| Test 1/Stress (18°C) (3)<br><i>mb247&gt;&gt;GAL80<sup>ts</sup>&gt;5HT1A<sup>RNAi</sup></i><br>R: 37.714 | --                | --                           | ~1.0000<br>0.5196            | < 10 <sup>-5</sup><br>4.7738 | ~1.0000<br>0.5707            |
| Test 1/Stress (29°C) (4)<br><i>mb247&gt;&gt;GAL80<sup>ts</sup>&gt;5HT1A<sup>RNAi</sup></i><br>R: 31.905 | --                | --                           | --                           | < 10 <sup>-5</sup><br>5.2870 | ~1.0000<br>0.0511            |
| Test 2/Stress (18°C)(5)<br><i>mb247&gt;&gt;GAL80<sup>ts</sup>&gt;5HT1A<sup>RNAi</sup></i><br>R: 91.750  | --                | --                           | --                           | --                           | < 10 <sup>-5</sup><br>5.3375 |
| Test 2/Stress (29°C) (6)<br><i>mb247&gt;&gt;GAL80<sup>ts</sup>&gt;5HT1A<sup>RNAi</sup></i><br>R: 31.333 | --                | --                           | --                           | --                           | --                           |

**Tab. 10b** refers to data presented in Figure S4b

p-values of the KOLMOGOROV-SMIRNOV-Test (KS); LILLIFORS-Tests (Lillif) and SHAPIRO-WILK-Test (SW).

|                                                                                                                           | N  | Std.Dev. | p KS   | p Lillif | p SW     |
|---------------------------------------------------------------------------------------------------------------------------|----|----------|--------|----------|----------|
| <b>Pretest</b><br><i>mb247&gt;&gt;GAL80<sup>ts</sup>&gt;5HT1B<sup>RNAi</sup></i>                                          | 18 | 0.7048   | < 0.10 | < 0.01   | = 0.0056 |
| <b>Pretest</b><br><i>mb247&gt;&gt;GAL80<sup>ts</sup>&gt;5HT1B<sup>RNAi</sup></i>                                          | 18 | 0.8498   | < 0.10 | < 0.01   | = 0.0159 |
| <b>Test 1</b><br><i>mb247&gt;&gt;GAL80<sup>ts</sup>&gt;5HT1B<sup>RNAi</sup></i><br><b>Stressed Group (18°C)</b>           | 18 | 1.1827   | < 0.15 | < 0.01   | = 0.0865 |
| <b>Test 1</b><br><i>mb247&gt;&gt;GAL80<sup>ts</sup>&gt;5HT1B<sup>RNAi</sup></i><br><b>Stressed Group (29°C)</b>           | 18 | 0.9785   | > 0.20 | < 0.05   | = 0.0267 |
| <b>Test 2 (sucrose)</b><br><i>mb247&gt;&gt;GAL80<sup>ts</sup>&gt;5HT1B<sup>RNAi</sup></i><br><b>Stressed Group (18°)</b>  | 17 | 0.8703   | < 0.15 | < 0.01   | = 0.0139 |
| <b>Test 2 (sucrose)</b><br><i>mb247&gt;&gt;GAL80<sup>ts</sup>&gt;5HT1B<sup>RNAi</sup></i><br><b>Stressed Group (29°C)</b> | 17 | 1.1726   | > 0.20 | < 0.05   | = 0.0997 |

Comparison of the unpaired median data by the KRUSKAL-WALLIS-TEST (K-W).

Upper row: multiple p-values; lower row: z-values.

| Genotyp                                                                                                        | (2)               | (3)              | (4)               | (5)               | (6)                          |
|----------------------------------------------------------------------------------------------------------------|-------------------|------------------|-------------------|-------------------|------------------------------|
| K-Wallis-Test: H(5 N=106)= 39.0988 p< 10 <sup>-5</sup>                                                         |                   |                  |                   |                   |                              |
| <b>Pretest/Stress (1)</b><br><i>mb247&gt;&gt;GAL80<sup>ts</sup>&gt;5HT1B<sup>RNAi</sup></i><br>R: 60.972       | ~1.0000<br>0.5584 | 0.0001<br>4.5131 | ~1.0000<br>0.0379 | ~1.0000<br>0.0313 | ~1.0000<br>0.8032            |
| <b>Pretest/Stress (2)</b><br><i>mb247&gt;&gt;GAL80<sup>ts</sup>&gt;5HT1B<sup>RNAi</sup></i><br>R: 55.250       | --                | 0.0011<br>3.9548 | ~1.0000<br>0.5963 | ~1.0000<br>0.5191 | ~1.0000<br>1.3536            |
| <b>Test 1/Stress (18°C) (3)</b><br><i>mb247&gt;&gt;GAL80<sup>ts</sup>&gt;5HT1B<sup>RNAi</sup></i><br>R: 14.722 | --                | --               | 0.0001<br>4.5511  | 0.0002<br>4.4169  | < 10 <sup>-5</sup><br>5.2514 |
| <b>Test 1/Stress (29°) (4)</b><br><i>mb247&gt;&gt;GAL80<sup>ts</sup>&gt;5HT1B<sup>RNAi</sup></i><br>R: 61.361  | --                | --               | --                | ~1.0000<br>0.0687 | ~1.0000<br>0.7658            |
| <b>Test 2/Stress (18°C)(5)</b><br><i>mb247&gt;&gt;GAL80<sup>ts</sup>&gt;5HT1B<sup>RNAi</sup></i><br>R: 60.647  | --                | --               | --                | --                | ~1.0000<br>0.8228            |
| <b>Test 2/Stress (29°C) (6)</b><br><i>mb247&gt;&gt;GAL80<sup>ts</sup>&gt;5HT1B<sup>RNAi</sup></i><br>R: 69.324 | --                | --               | --                | --                | --                           |

## Supplementary References

- S1. Sweeney, S. T., Broadie, K., Keane, J., Niemann, H. & O'Kane, C. J. Targeted expression of tetanus toxin light chain in *Drosophila* specifically eliminates synaptic transmission and causes behavioral defects. *Neuron* **14**, 341-351 (1995).
- S2. Aso, Y. *et al.* The mushroom body of adult *Drosophila* characterized by GAL4 drivers. *J. Neurogenet.* **23**, 156-172 (2009).
- S3. Gasque, G., Conway, S., Huang, J., Rao, Y. & Vosshall, L. B. Small molecule drug screening in *Drosophila* identifies the 5HT2A receptor as a feeding modulation target. *Sci. Rep.* **3**, srep02120 doi: 10.1038/srep02120 (2013).
- S4. Yuan, Q., Lin, F., Zheng, X. & Sehgal, A. Serotonin modulates circadian entrainment in *Drosophila*. *Neuron* **47**, 115-127 (2005).
- S5. McGuire, S. E., Le, P. T., Osborn, A. J., Matsumoto, K. & Davis, R. L. Spatiotemporal rescue of memory dysfunction in *Drosophila*. *Science* **302**, 1765-1768 (2003).
